# Supplementary material for: Fabrication of silk sericin–anthocyanin nanocoating for chelating and saturation-visualization detection of metal ions
Source: Royal Society of Chemistry journal article supplement (doi:10.1039/d2nr04047f), 2022-01-01
Supplement: d2nr04047f1.pdf [file d2nr04047f1.pdf]

## Supplementary Material

### Fabrication of Silk Sericin-Anthocyanin Nanocoating for Chelating and Saturation-Visualization Detection of Metal Ions

Liang Yao,<sup>a, 1</sup> Minglu Hao,<sup>b, 1</sup> Feng Zhao,<sup>c</sup> Yilin Wang,<sup>d</sup> Yueru Zhou,<sup>c</sup> Zhongyi Liu,<sup>c</sup> Xiaofan An,<sup>b</sup> Zhongfeng Gao,<sup>b</sup> Jun Wang,<sup>a</sup> Tao Zheng,<sup>c</sup> Pu Chen,<sup>b, c, \*</sup> and Lei Zhang<sup>c, \*</sup>

<sup>a</sup> School of Biotechnology and Sericultural Research Institute, Jiangsu University of Science and Technology, Zhenjiang, Jiangsu 212018, China

<sup>b</sup> School of Advanced Materials Institute, Qilu University of Technology, Shandong Academy of Sciences, Jinan 250014, China

<sup>c</sup> Department of Chemical Engineering and Waterloo Institute for Nanotechnology, University of Waterloo, Waterloo, Ontario, Canada, N2L 3G1

<sup>d</sup> Institute of Translational Medicine, Zhejiang University, Hangzhou, Zhejiang 310029, China

<sup>e</sup> Guangzhou Institute of Energy Conversion, Chinese Academy of Sciences, Guangzhou, China, 510640

Corresponding Authors:

Department of Chemical Engineering and Waterloo Institute for Nanotechnology, University of Waterloo, Waterloo, Ontario, Canada, N2L 3G1

\* E-mail: [178zhang@uwaterloo.ca](mailto:178zhang@uwaterloo.ca) (L. Zhang) & [p4chen@uwaterloo.ca](mailto:p4chen@uwaterloo.ca) (P. Chen)

<sup>1</sup> These authors contributed equally.

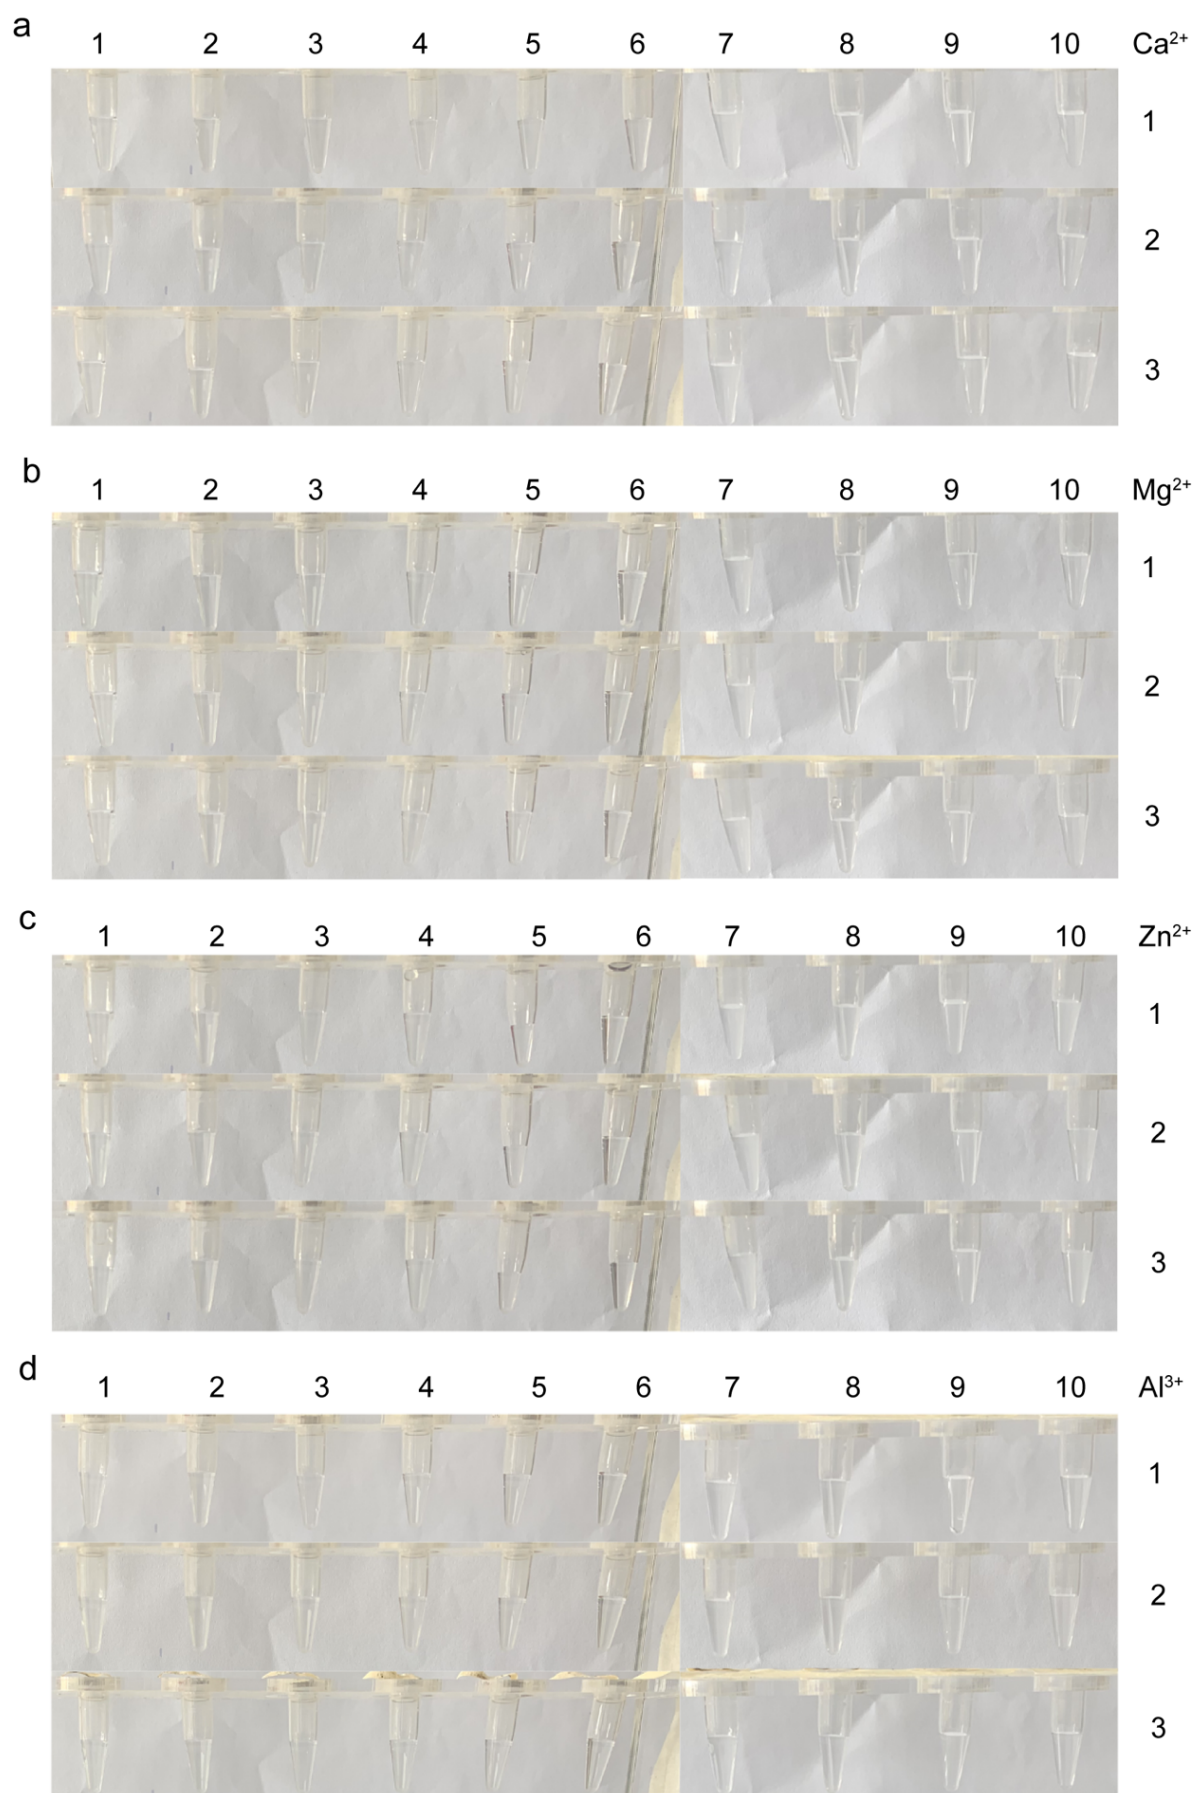

**Fig. S1** Images of different concentrations of (a)  $\text{Ca}^{2+}$ , (b)  $\text{Mg}^{2+}$ , (c)  $\text{Zn}^{2+}$ , and (d)  $\text{Al}^{3+}$  solution.



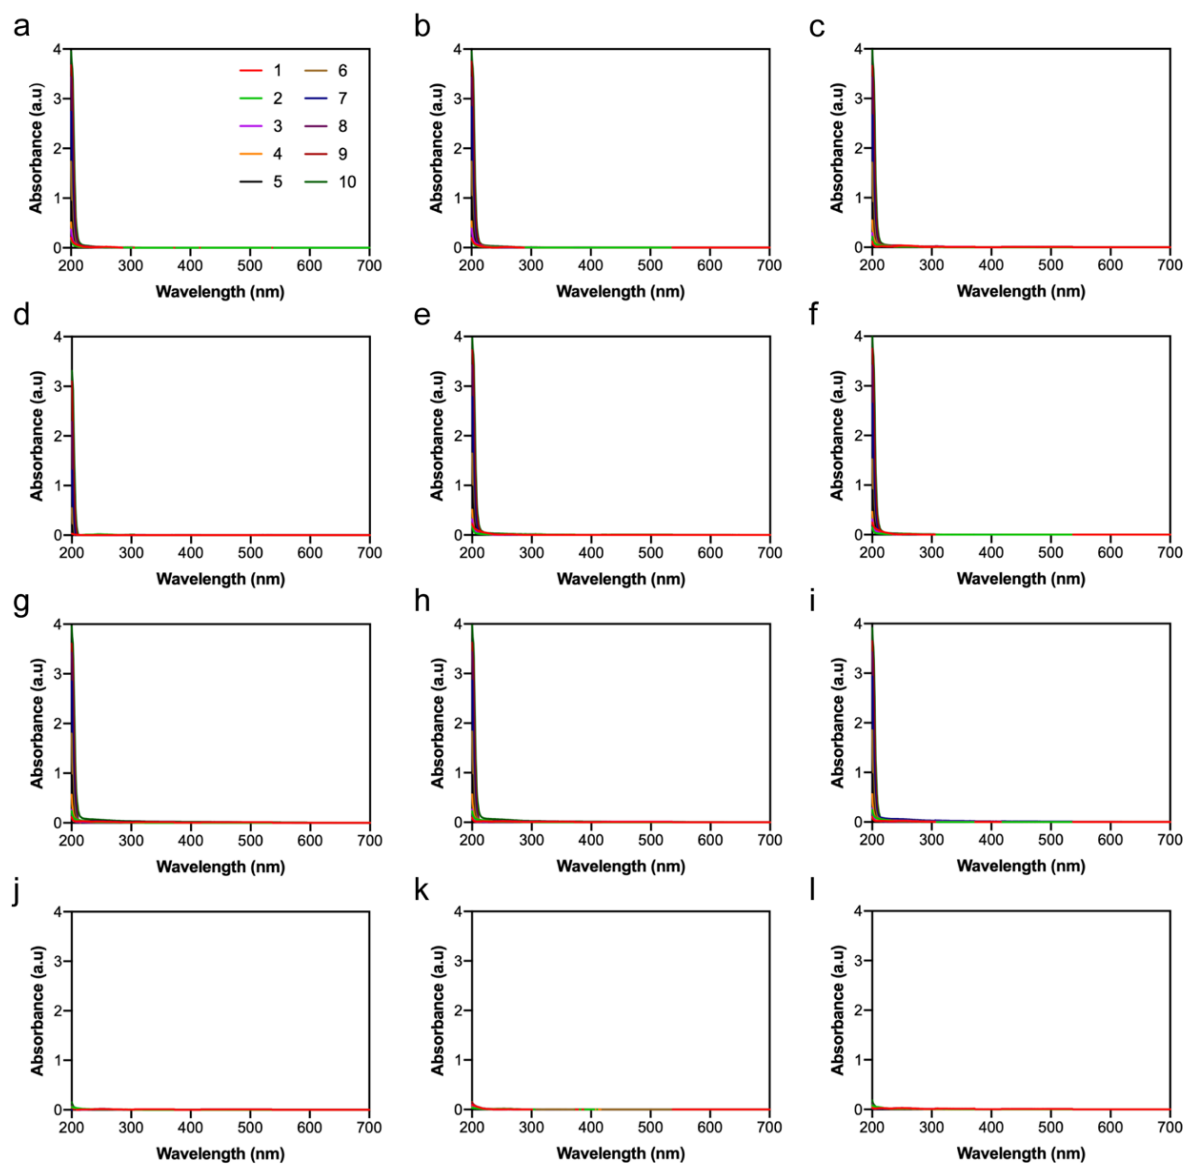

**Fig. S2** UV-Vis absorbance of different concentrations of (a-c)  $\text{Ca}^{2+}$ , (d-f)  $\text{Mg}^{2+}$ , (g-i)  $\text{Zn}^{2+}$ , and (j-i)  $\text{Al}^{3+}$ .

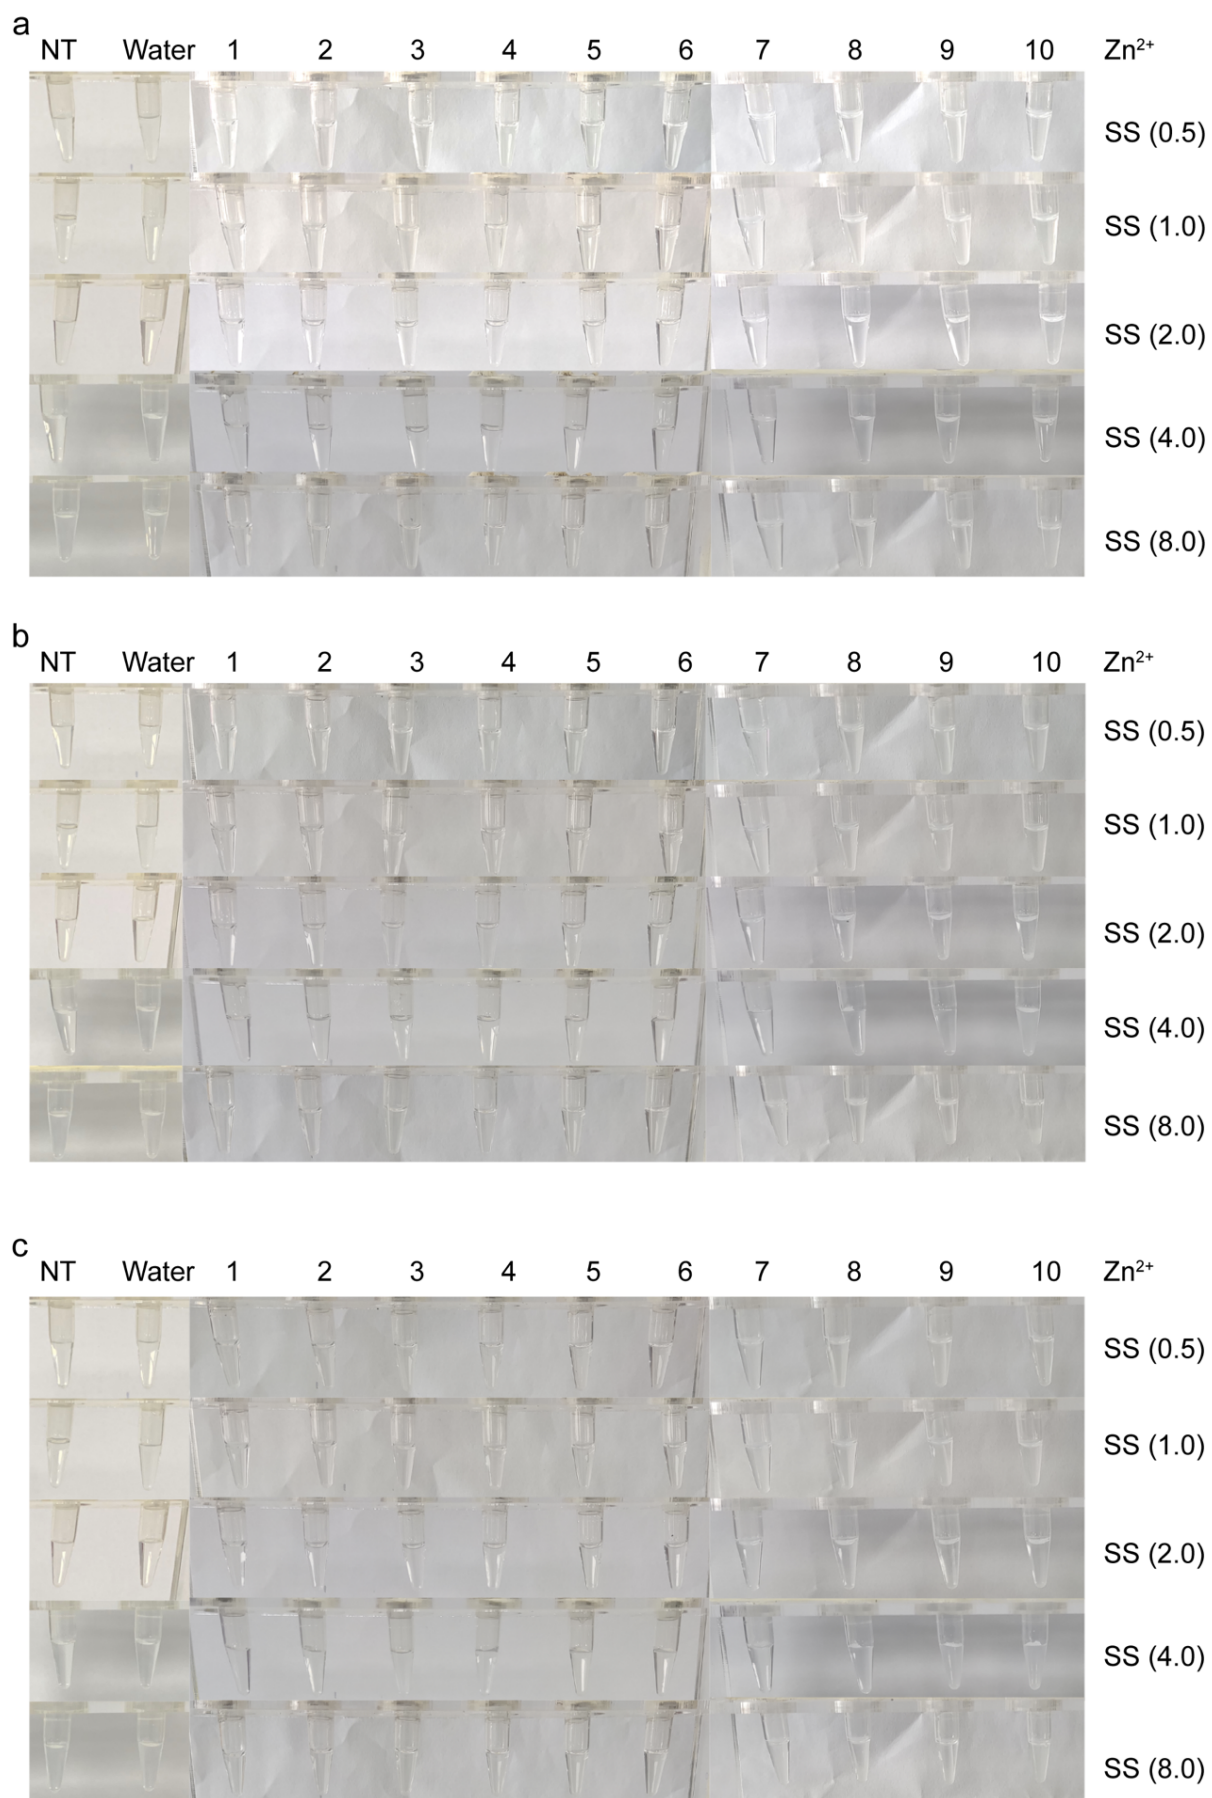

**Fig. S3** Images of different concentrations of SS mixed with Zn<sup>2+</sup>.

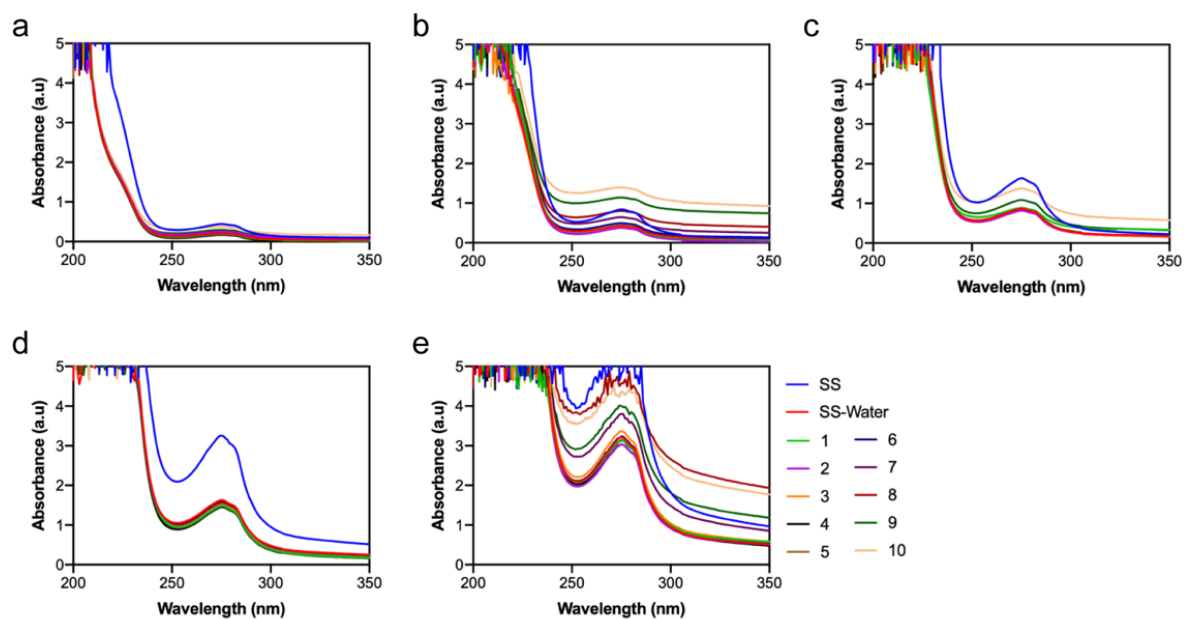

**Fig. S4** UV-Vis absorbance of (a) SS (0.5), (b) SS (1.0), (c) SS (2.0), (d) SS (4.0), and (e) SS (8.0) mixed with  $Zn^{2+}$  (Test 1).

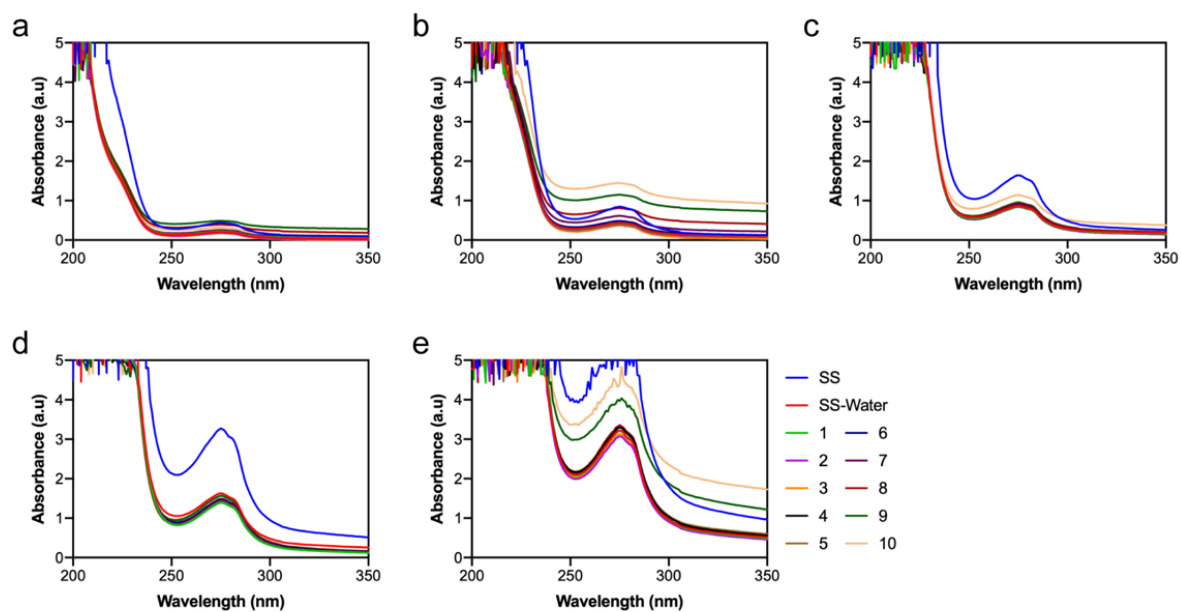

**Fig. S5** UV-Vis absorbance of (a) SS (0.5), (b) SS (1.0), (c) SS (2.0), (d) SS (4.0), and (e) SS (8.0) mixed with  $Zn^{2+}$  (Test 2).

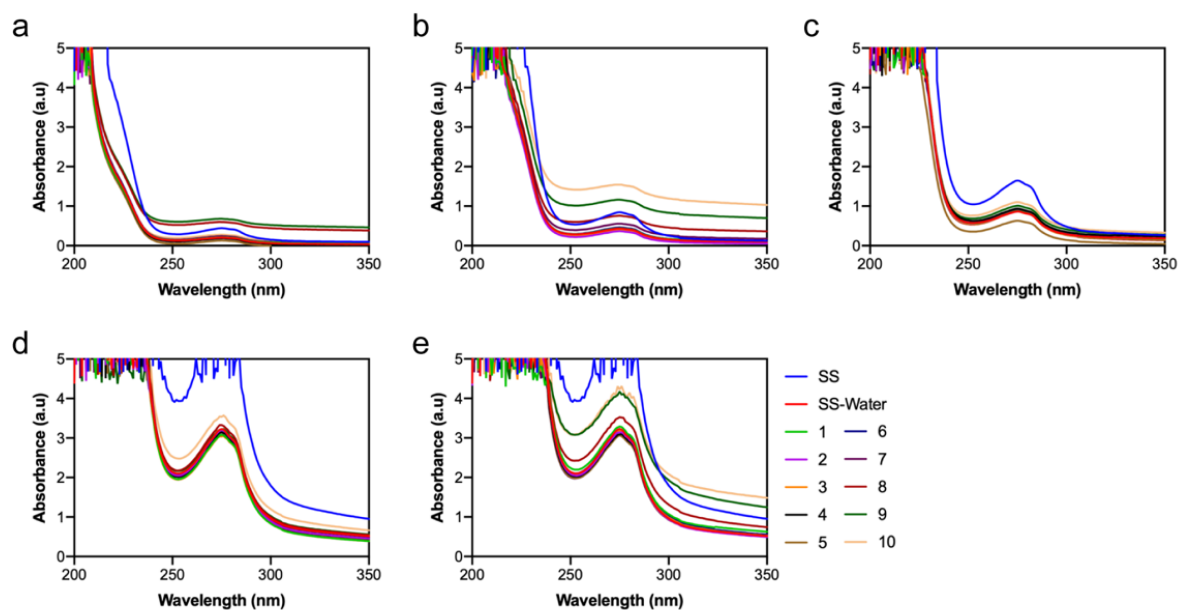

**Fig. S6** UV-Vis absorbance of (a) SS (0.5), (b) SS (1.0), (c) SS (2.0), (d) SS (4.0), and (e) SS (8.0) mixed with  $Zn^{2+}$  (Test 3).

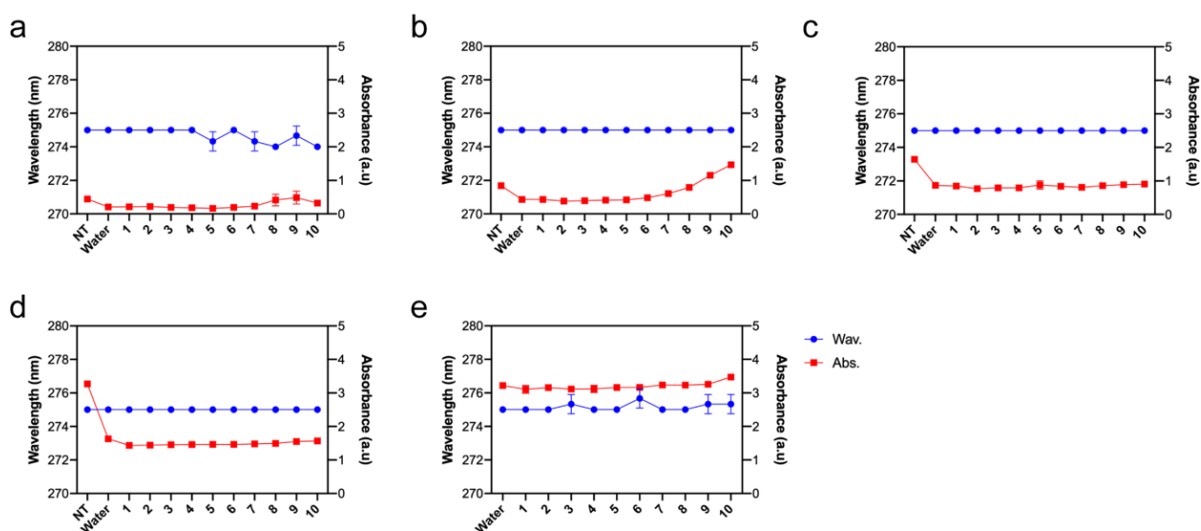

**Fig. S7** UV-Vis absorbance change of (a) SS (0.5), (b) SS (1.0), (c) SS (2.0), (d) SS (4.0), and (e) SS (8.0) mixed with  $Zn^{2+}$ .



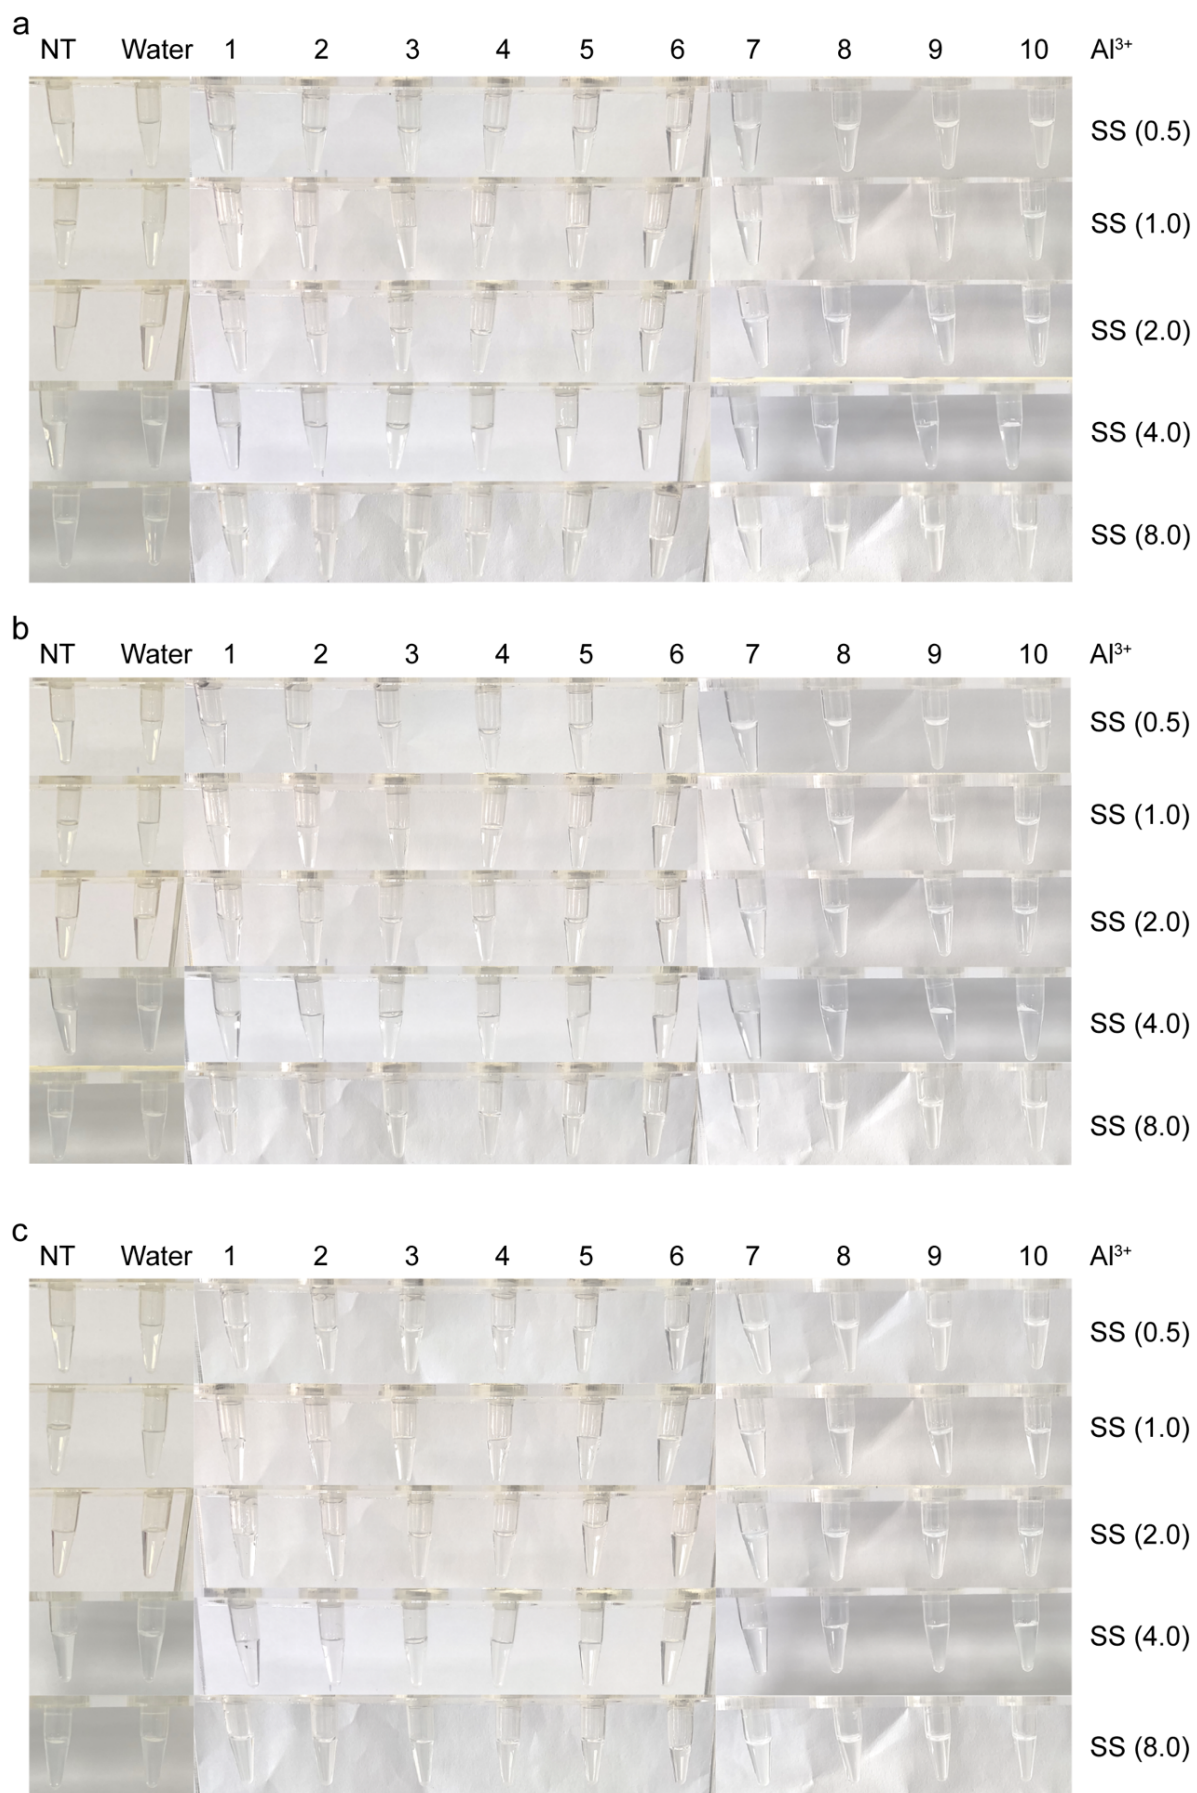

**Fig. S8** Images of different concentrations of SS mixed with Al<sup>3+</sup>.



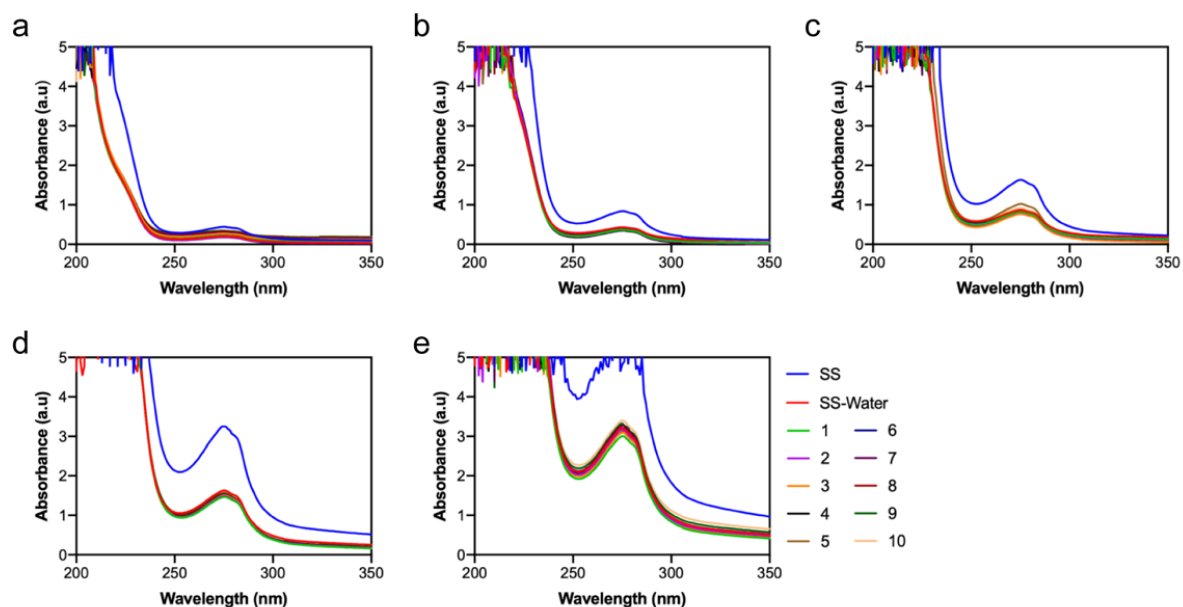

**Fig. S9** UV-Vis absorbance of (a) SS (0.5), (b) SS (1.0), (c) SS (2.0), (d) SS (4.0), and (e) SS (8.0) mixed with  $\text{Al}^{3+}$  (Test 1).

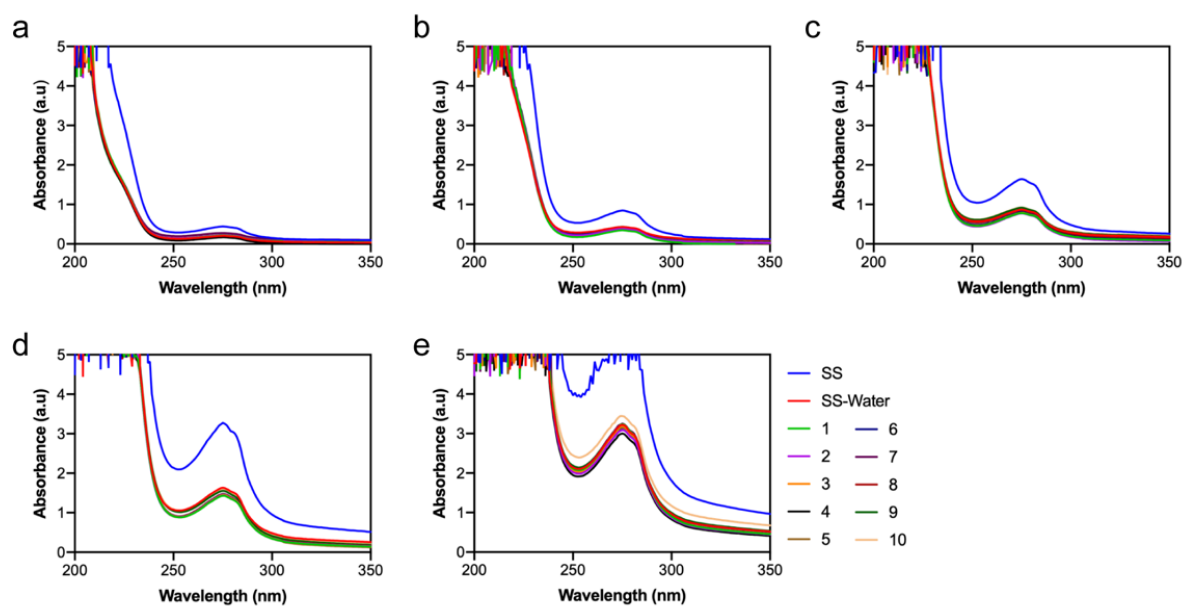

**Fig. S10** UV-Vis absorbance of (a) SS (0.5), (b) SS (1.0), (c) SS (2.0), (d) SS (4.0), and (e) SS (8.0) mixed with  $\text{Al}^{3+}$  (Test 2).

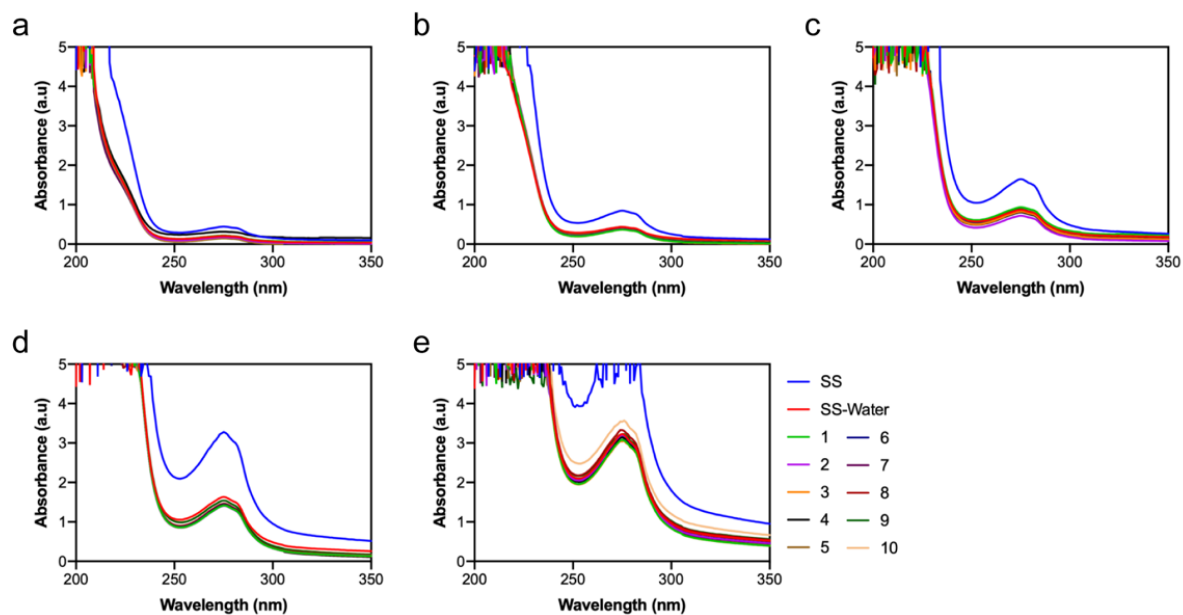

**Fig. S11** UV-Vis absorbance of (a) SS (0.5), (b) SS (1.0), (c) SS (2.0), (d) SS (4.0), and (e) SS (8.0) mixed with  $\text{Al}^{3+}$  (Test 3).

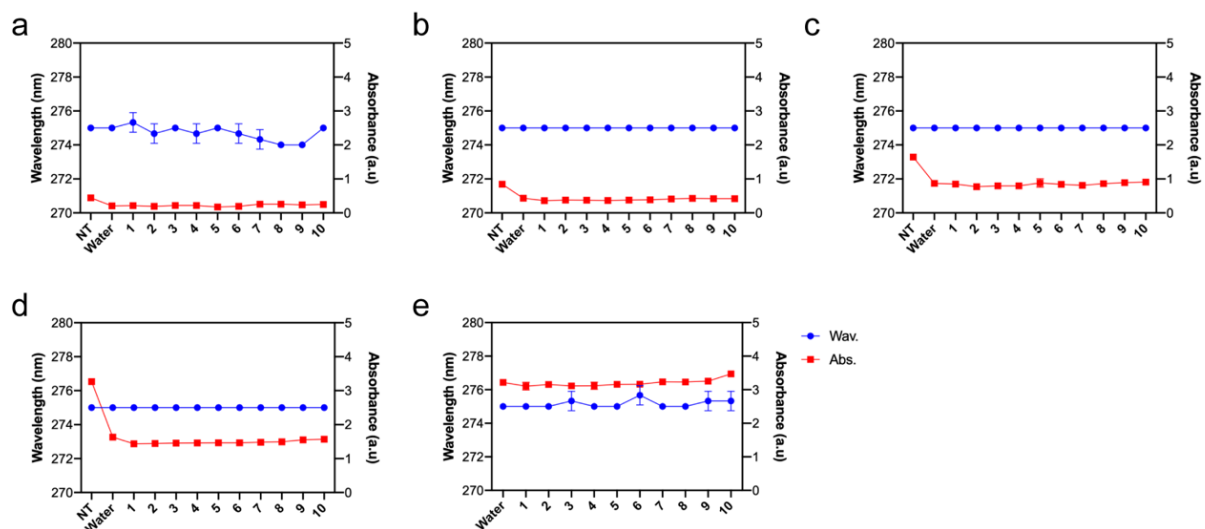

**Fig. S12** UV-Vis absorbance change of (a) SS (0.5), (b) SS (1.0), (c) SS (2.0), (d) SS (4.0), and (e) SS (8.0) mixed with  $\text{Al}^{3+}$ .

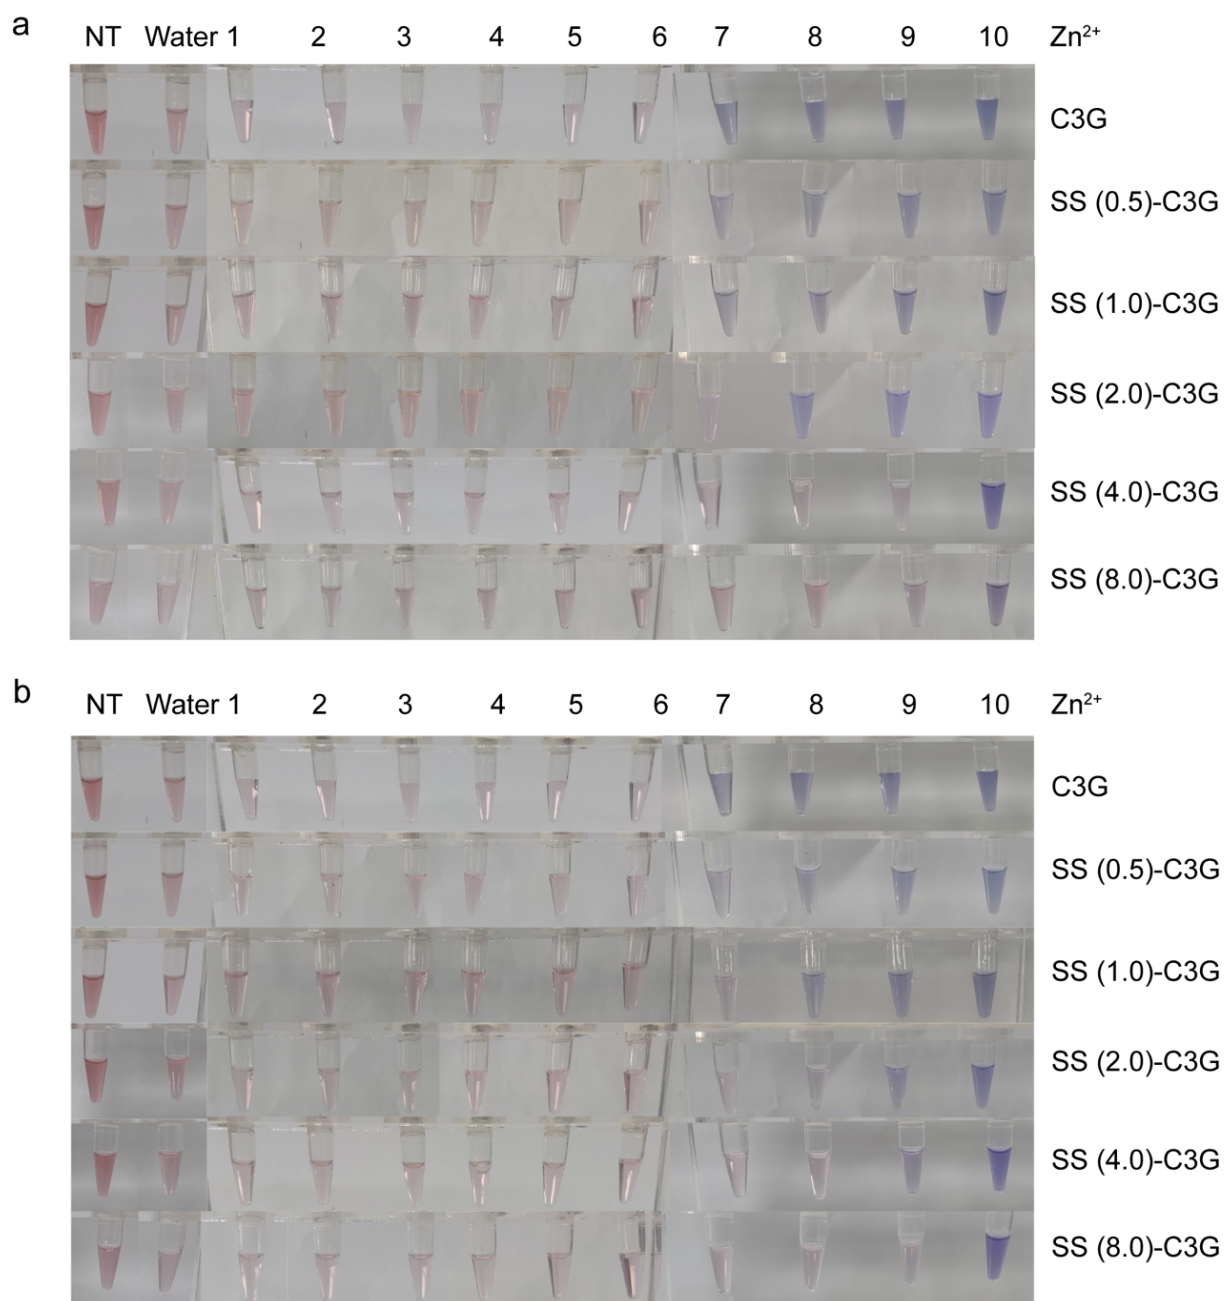

**Fig. S13** Images of C3G and SS-C3G nanocomplex after mixing with different concentrations of Zn<sup>2+</sup> (Repeated tests).

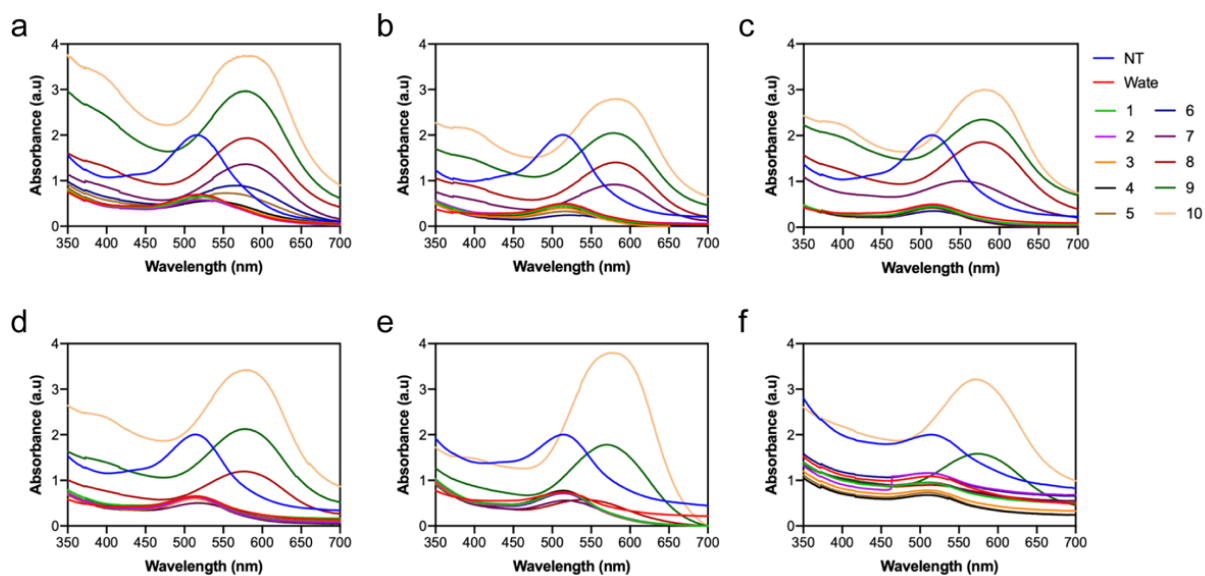

**Fig. S14** UV-Vis absorbance (a) C3G, (b) SS (0.5)-C3G, (c) SS (1.0)-C3G, (d) SS (2.0)-C3G, (e) SS (4.0)-C3G, and (f) SS (8.0)-C3G mixed with different concentrations of  $Zn^{2+}$  (Test 1).

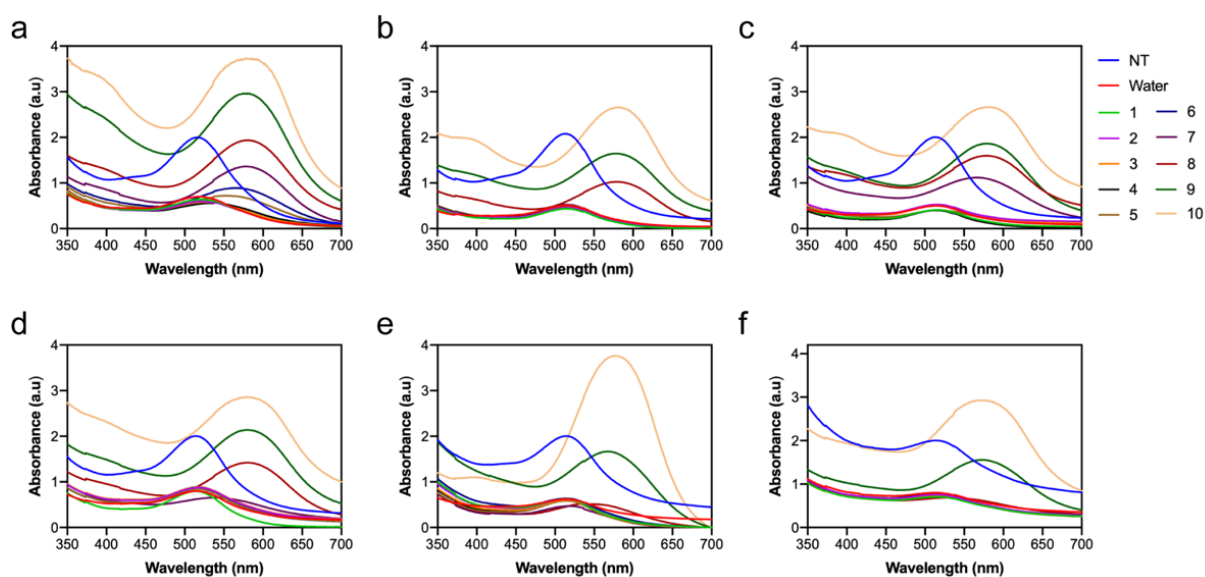

**Fig. S15** UV-Vis absorbance (a) C3G, (b) SS (0.5)-C3G, (c) SS (1.0)-C3G, (d) SS (2.0)-C3G, (e) SS (4.0)-C3G, and (f) SS (8.0)-C3G mixed with different concentrations of  $Zn^{2+}$  (Test 2).

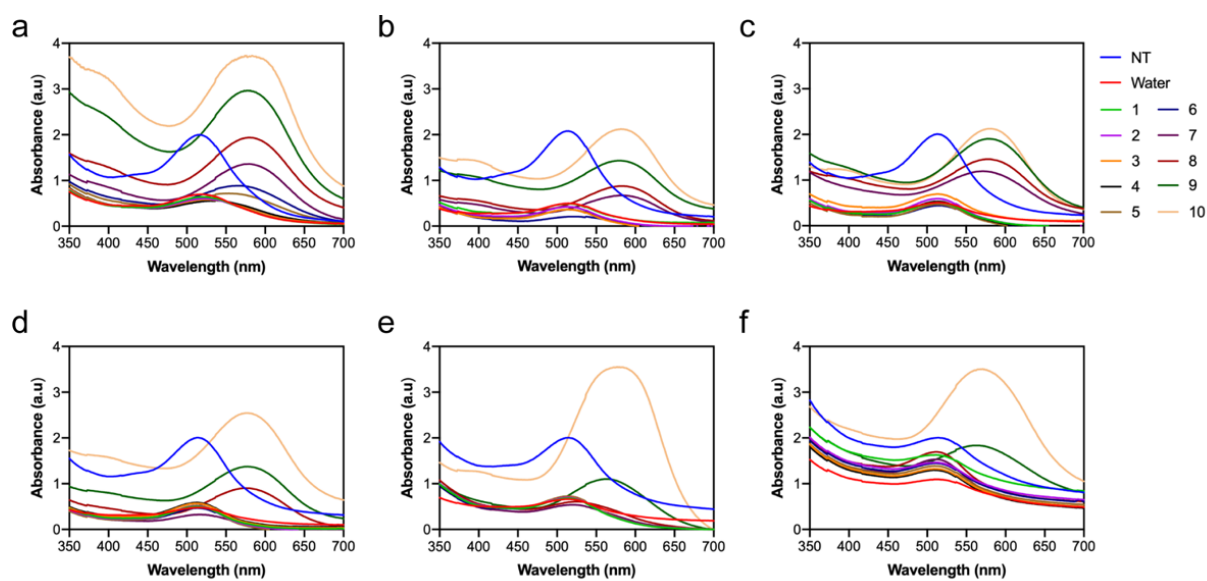

**Fig. S16** UV-Vis absorbance (a) C3G, (b) SS (0.5)-C3G, (c) SS (1.0)-C3G, (d) SS (2.0)-C3G, (e) SS (4.0)-C3G, and (f) SS (8.0)-C3G mixed with different concentrations of  $\text{Zn}^{2+}$  (Test 3).



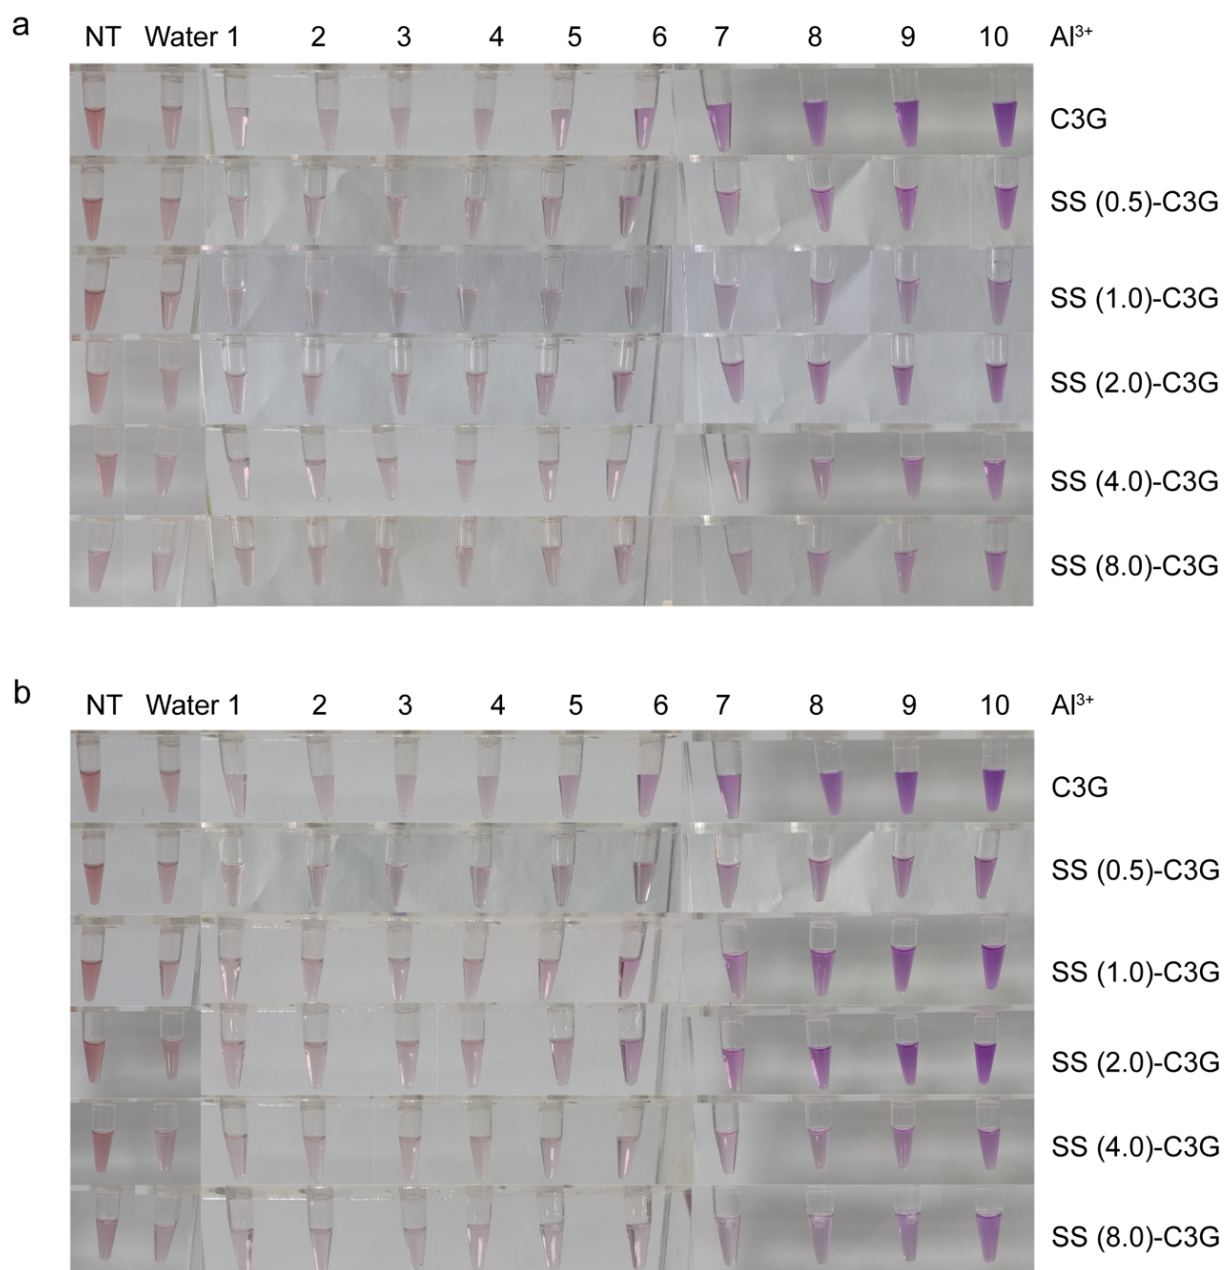

**Fig. S17** Images of C3G and SS-C3G nanocomplex after mixing with different concentrations of  $\text{Al}^{3+}$  (Repeated tests).

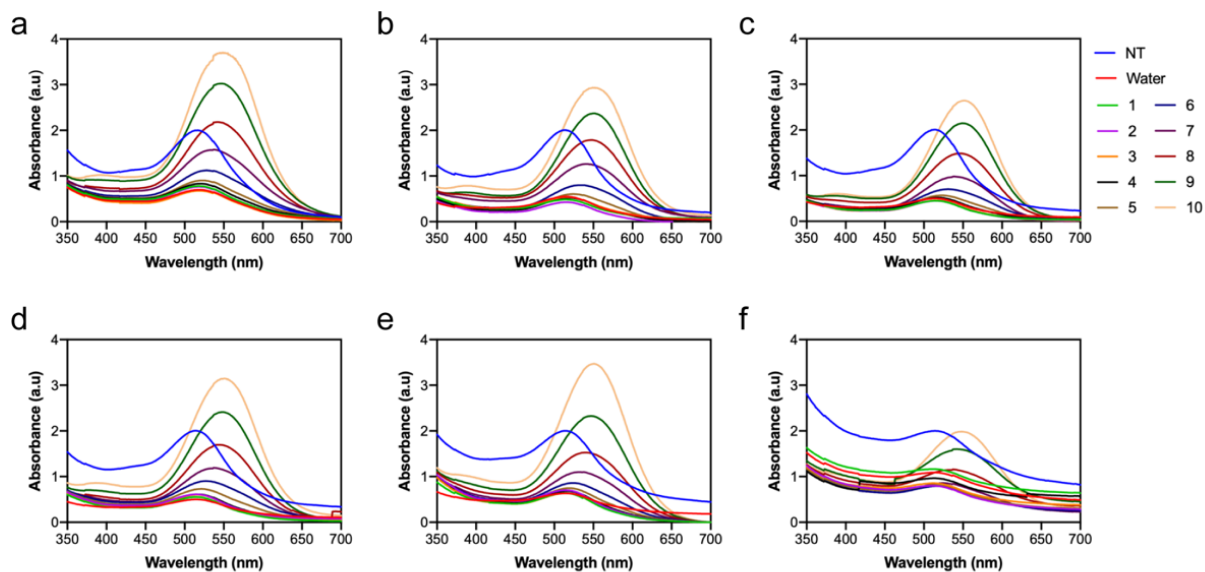

**Fig. S18** UV-Vis absorbance (a) C3G, (b) SS (0.5)-C3G, (c) SS (1.0)-C3G, (d) SS (2.0)-C3G, (e) SS (4.0)-C3G, and (f) SS (8.0)-C3G mixed with different concentrations of  $\text{Al}^{3+}$  (Test 1).

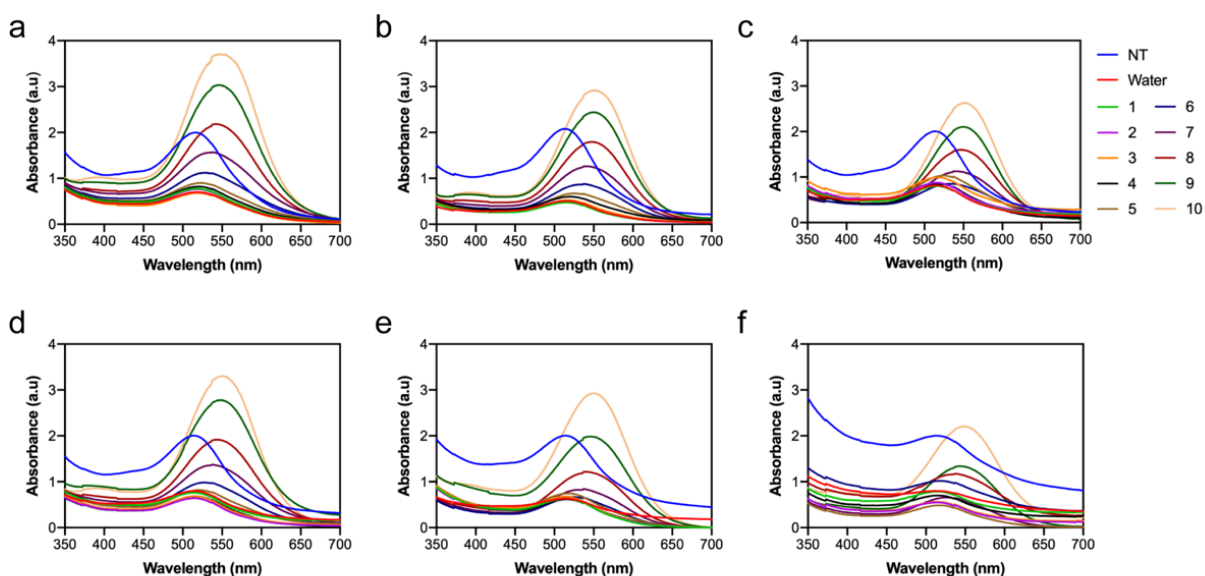

**Fig. S19** UV-Vis absorbance (a) C3G, (b) SS (0.5)-C3G, (c) SS (1.0)-C3G, (d) SS (2.0)-C3G, (e) SS (4.0)-C3G, and (f) SS (8.0)-C3G mixed with different concentrations of  $\text{Al}^{3+}$  (Test 2).

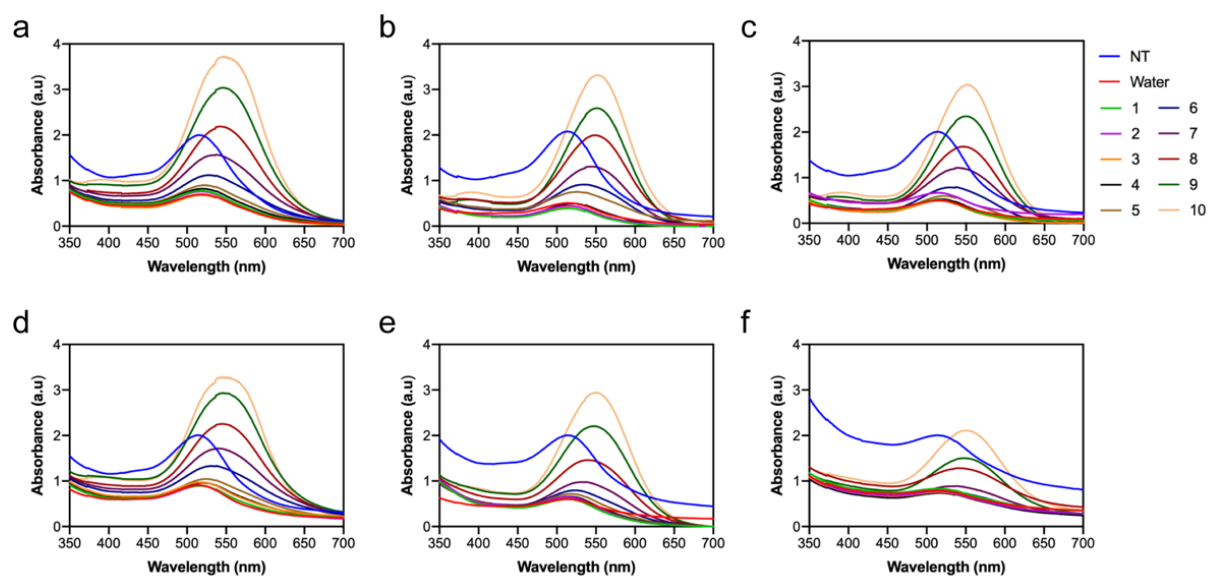

**Fig. S20** UV-Vis absorbance (a) C3G, (b) SS (0.5)-C3G, (c) SS (1.0)-C3G, (d) SS (2.0)-C3G, (e) SS (4.0)-C3G, and (f) SS (8.0)-C3G mixed with different concentrations of  $\text{Al}^{3+}$  (Test 3).

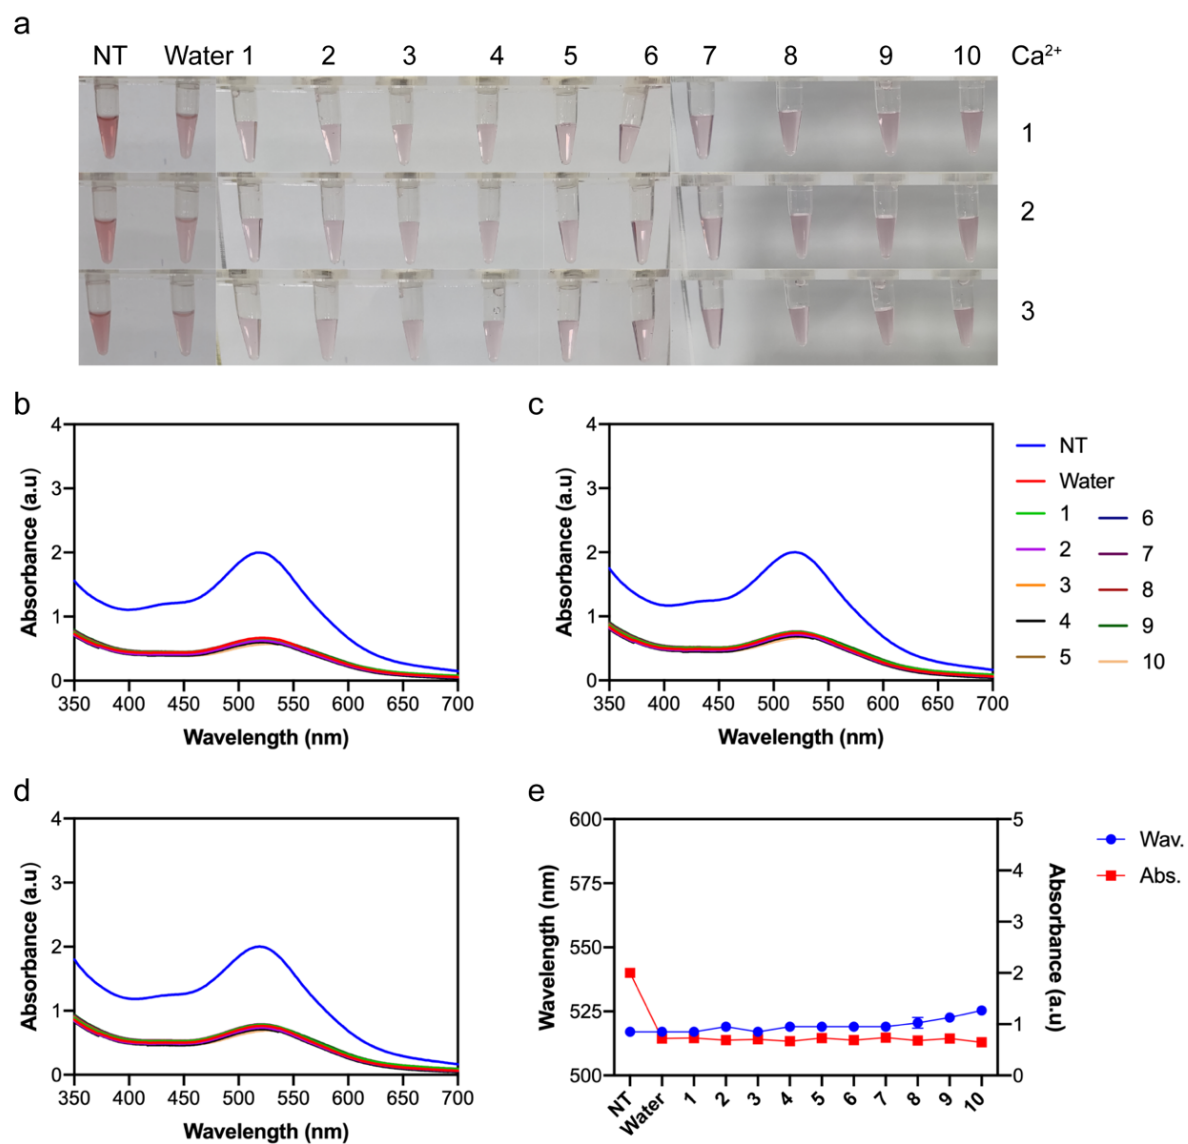

**Fig. S21** (a) Images of C3G mixed with  $\text{Ca}^{2+}$ . (b-c) UV-Vis absorbance and (e) UV-Vis absorbance change of C3G mixed with  $\text{Ca}^{2+}$ .

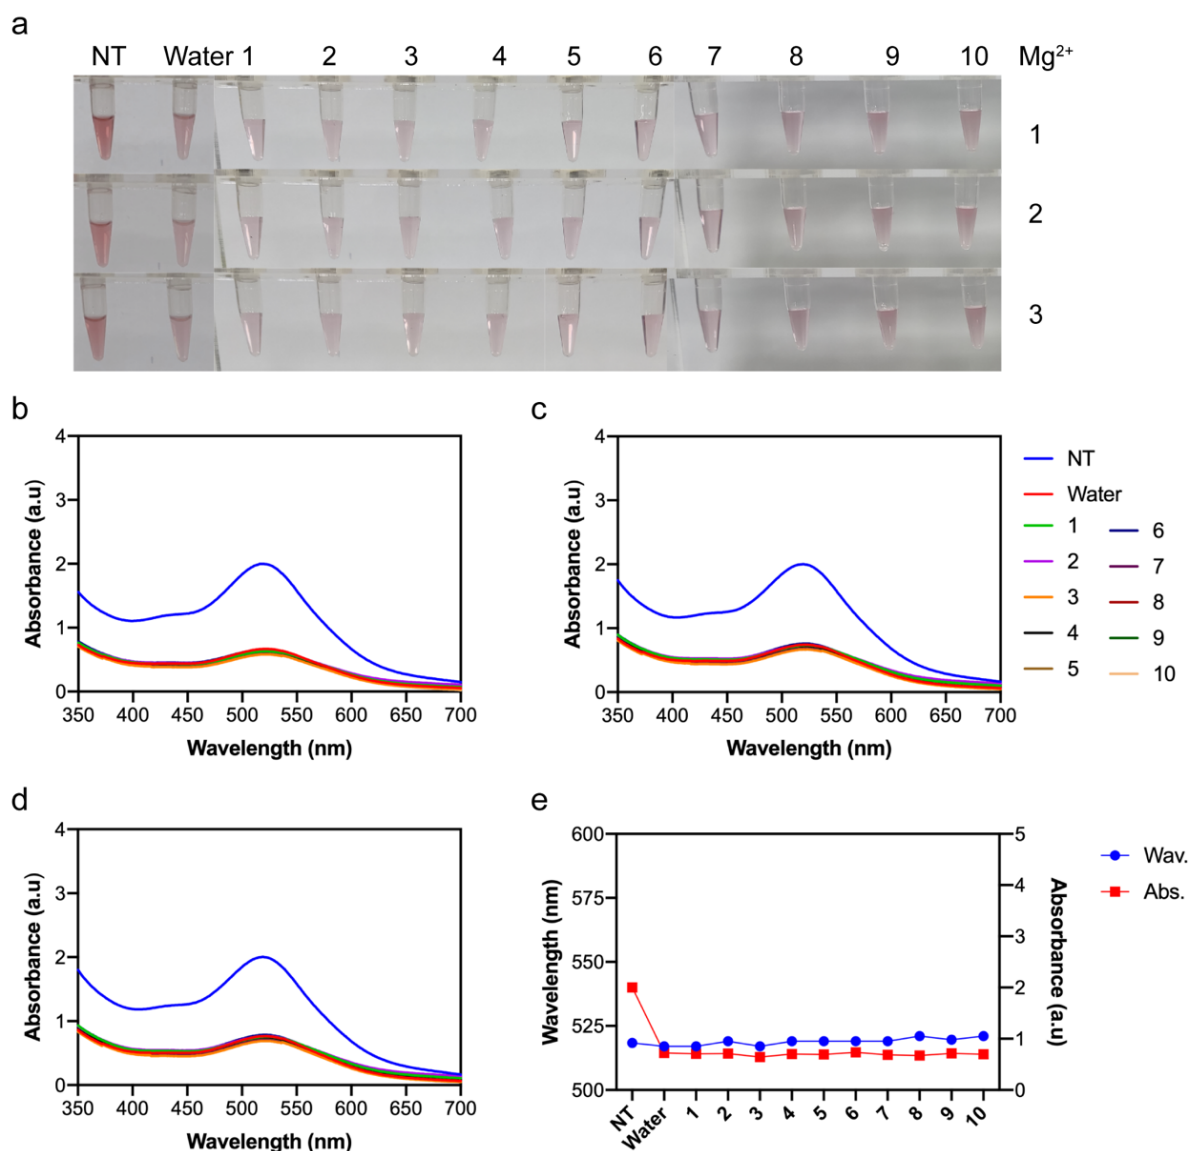

**Fig. S22** (a) Images of C3G mixed with  $\text{Mg}^{2+}$ . (b-c) UV-Vis absorbance and (e) UV-Vis absorbance change of C3G mixed with  $\text{Mg}^{2+}$ .



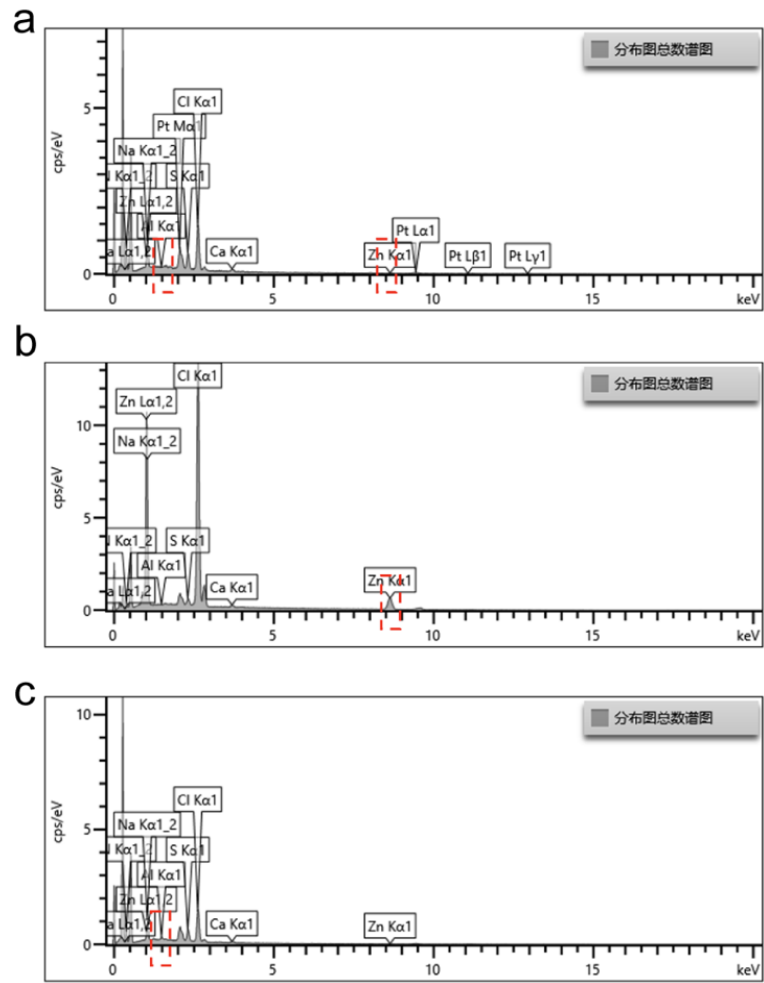

**Fig. S23** EDS result of (a) SS (4.0)-C3G, (b) SS (4.0)-C3G-Zn-10, (c) SS (4.0)-C3G-Al-10.

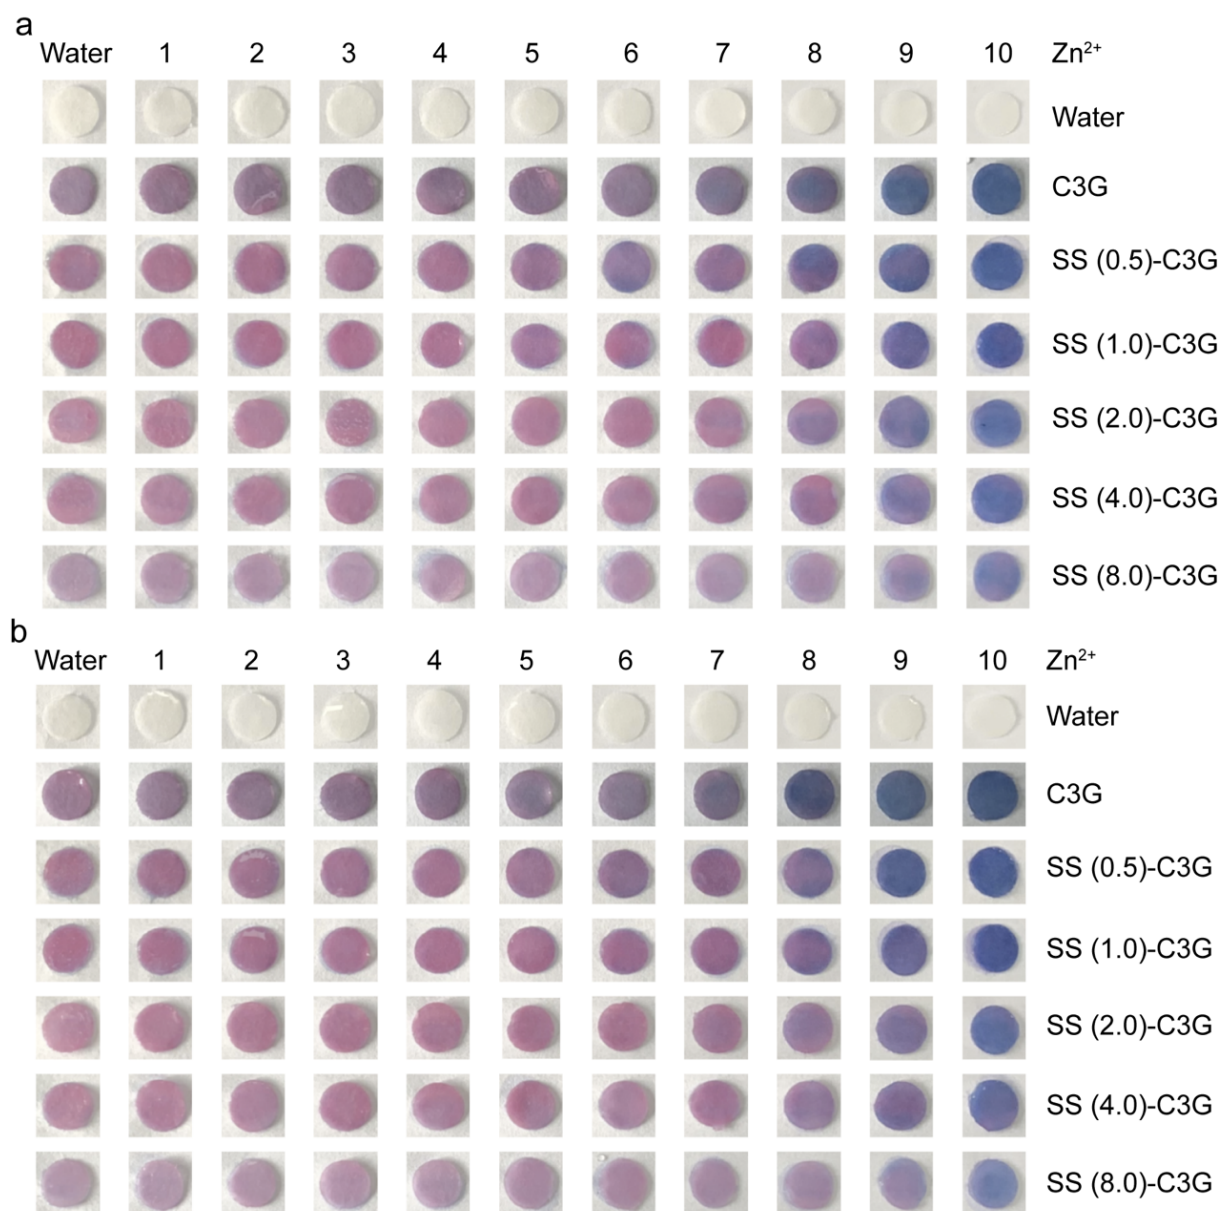

**Fig. S24** Images of C3G and SS-C3G nanocomplex films (filter paper) after mixing with different concentrations of Zn<sup>2+</sup> (Repeated tests).

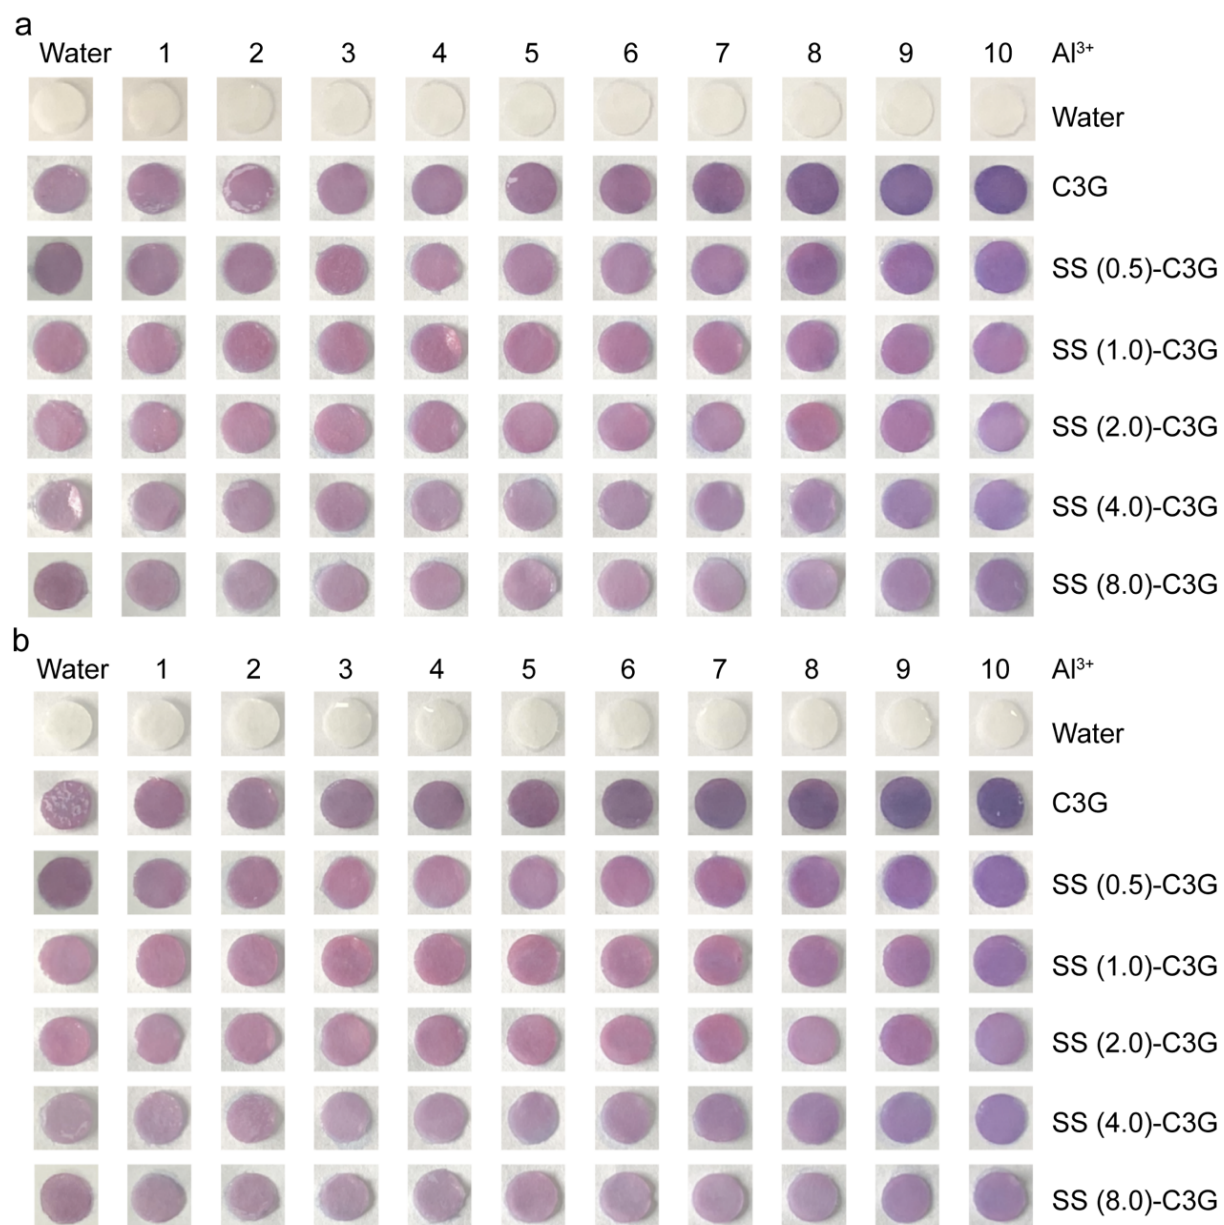

**Fig. S25** Images of C3G and SS-C3G nanocomplex films (filter paper) after mixing with different concentrations of  $\text{Al}^{3+}$  (Repeated tests).

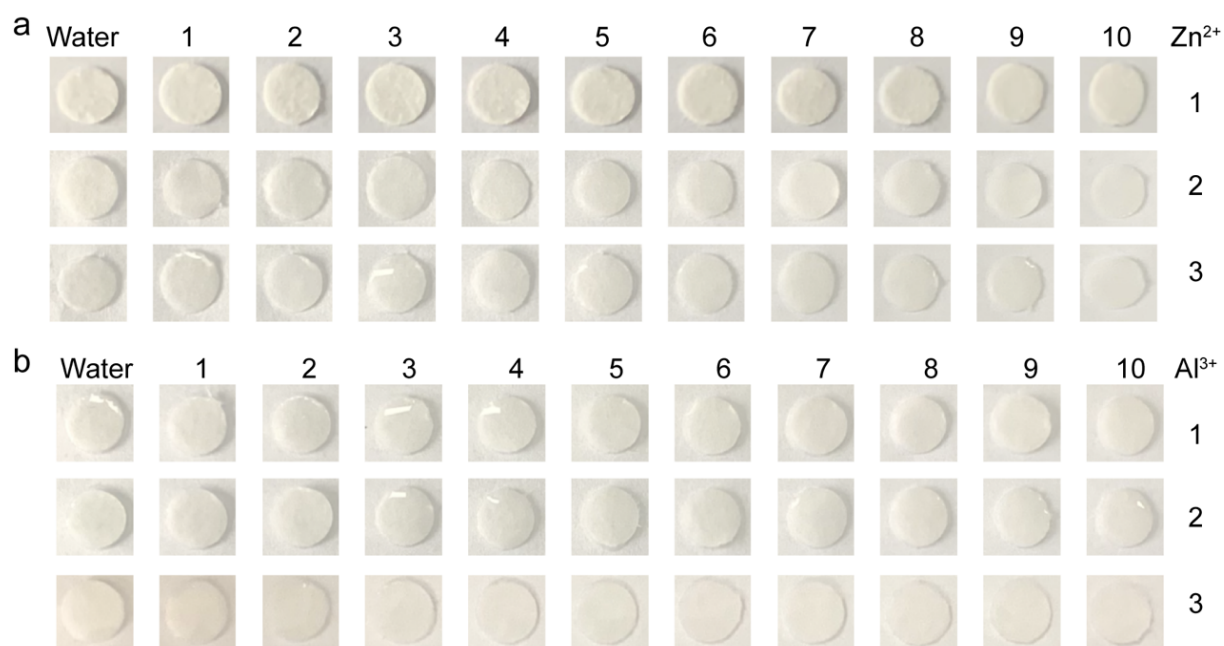

**Fig. S26** Images of filter paper after mixing with different concentrations of (a) Zn<sup>2+</sup> and (b) Al<sup>3+</sup>.

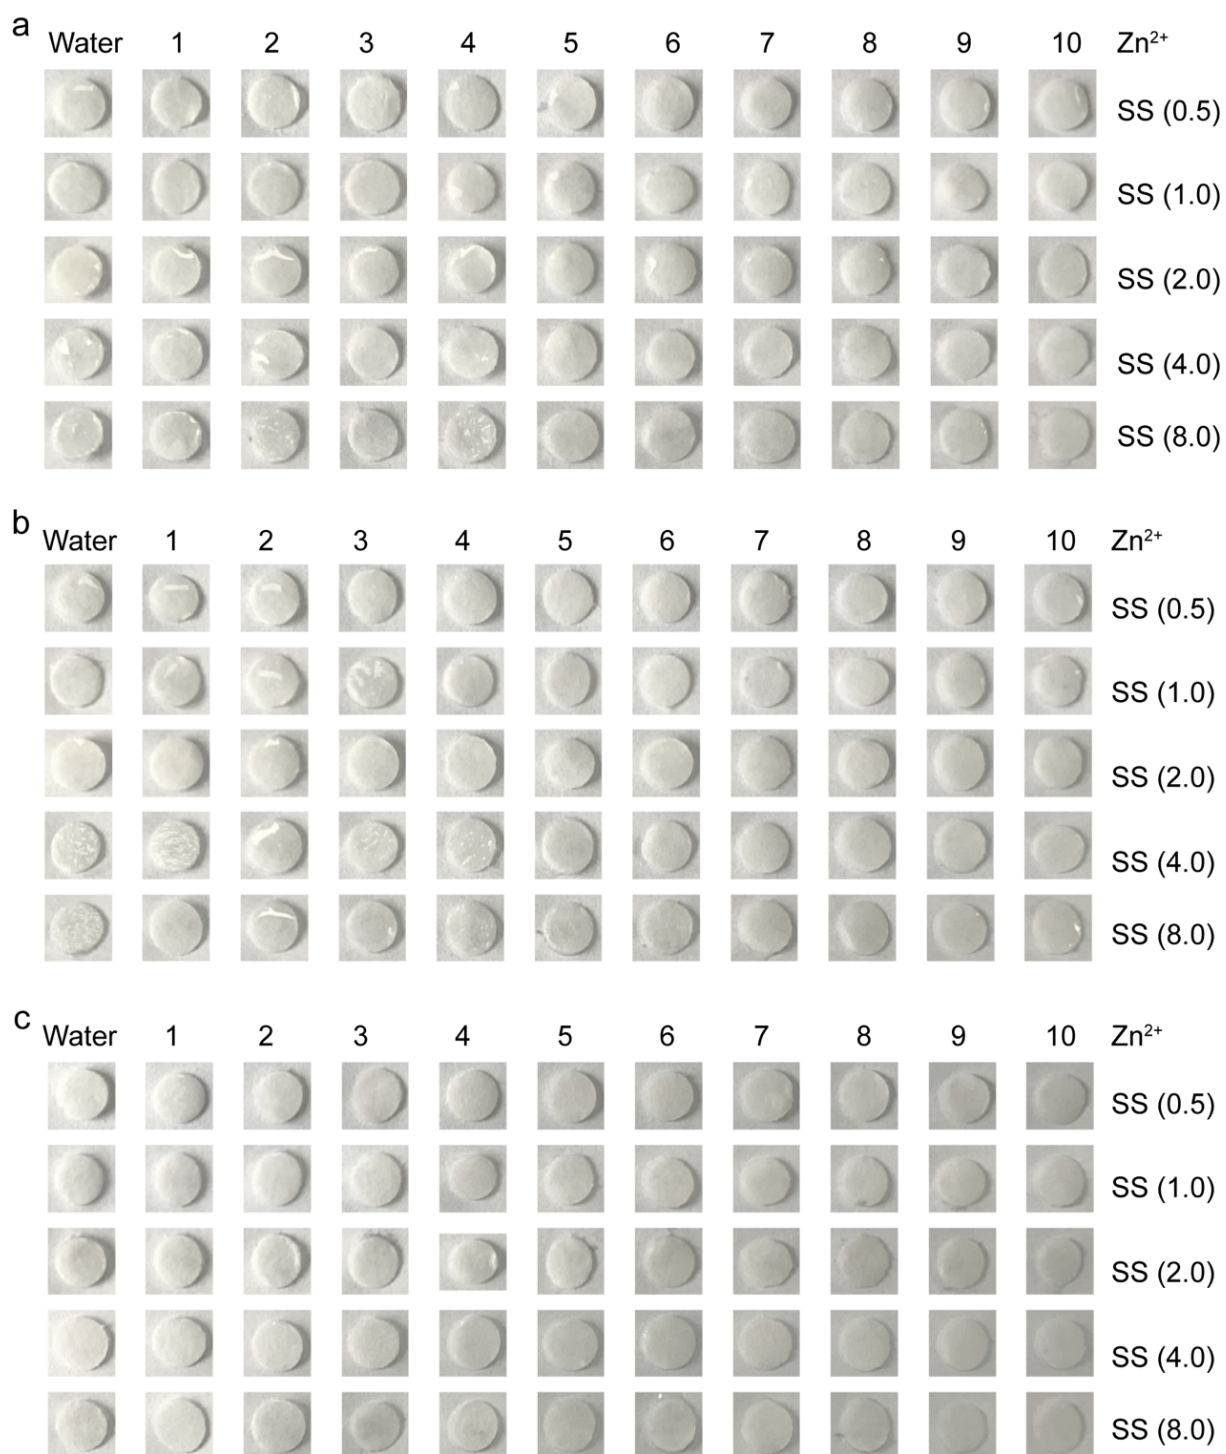

**Fig. S27** Images of SS films (filter paper) after mixing with different concentrations of Zn<sup>2+</sup>. (Repeated tests).



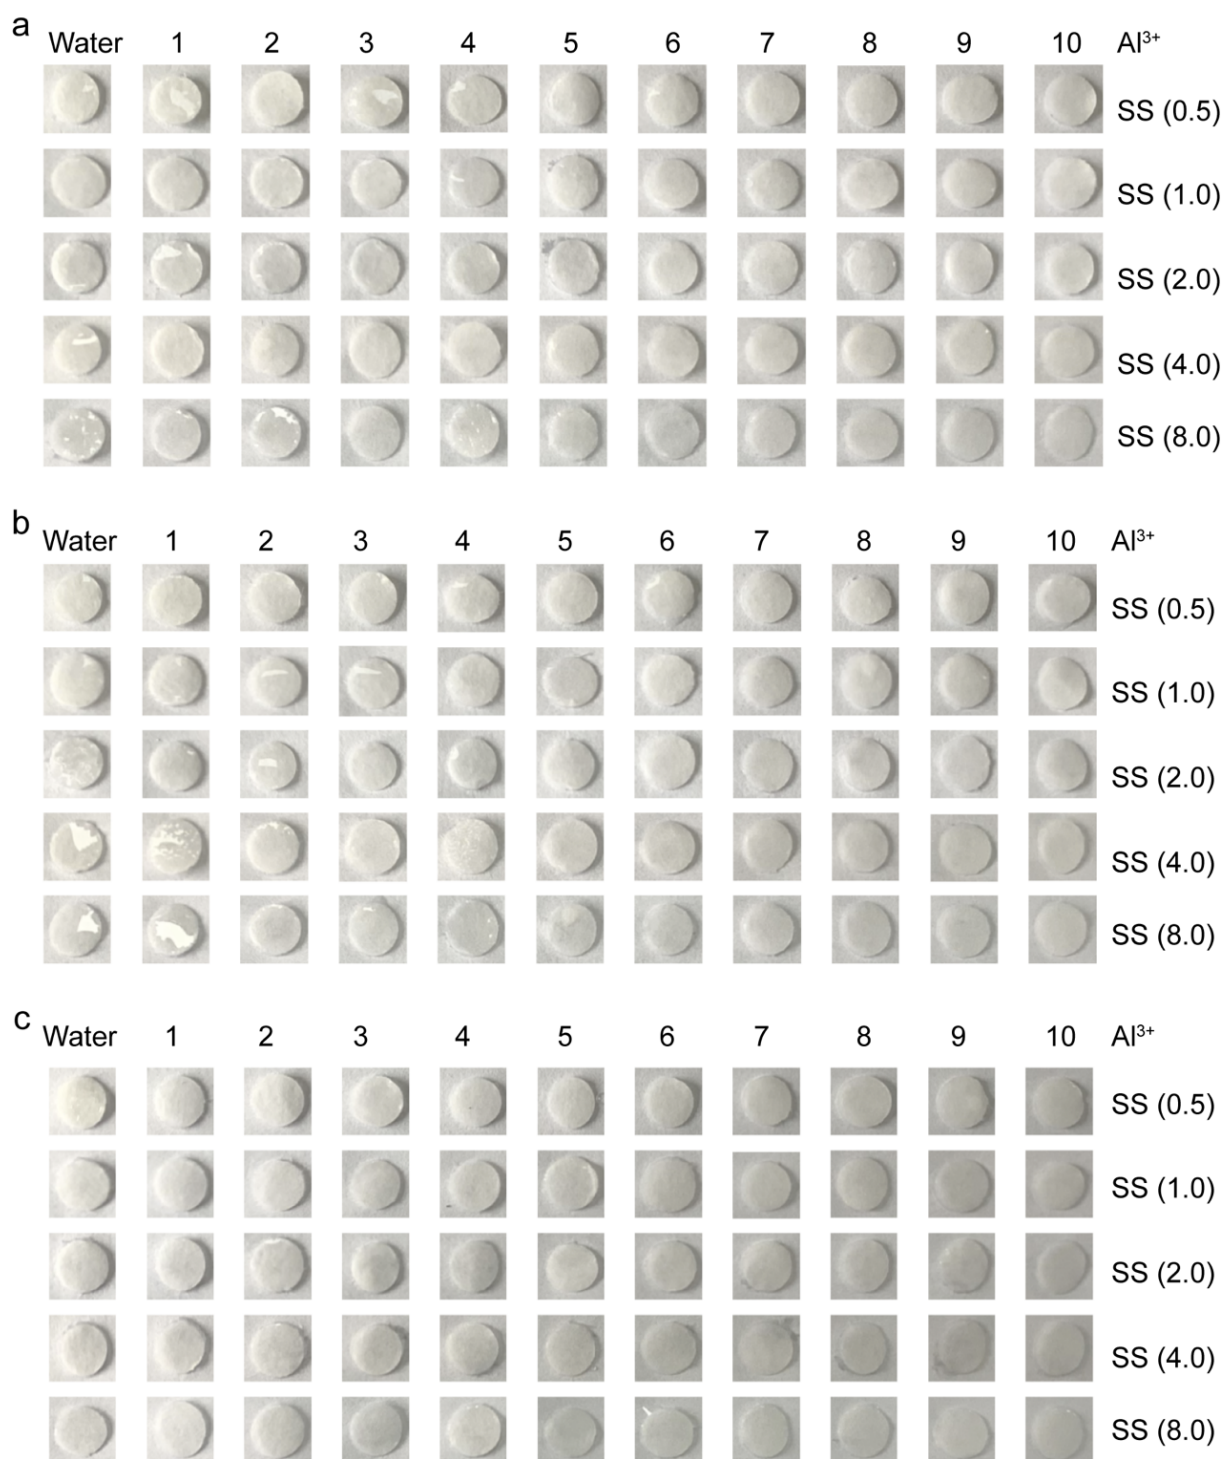

**Fig. S28** Images of SS films (filter paper) after mixing with different concentrations of  $\text{Al}^{3+}$ . (Repeated tests).

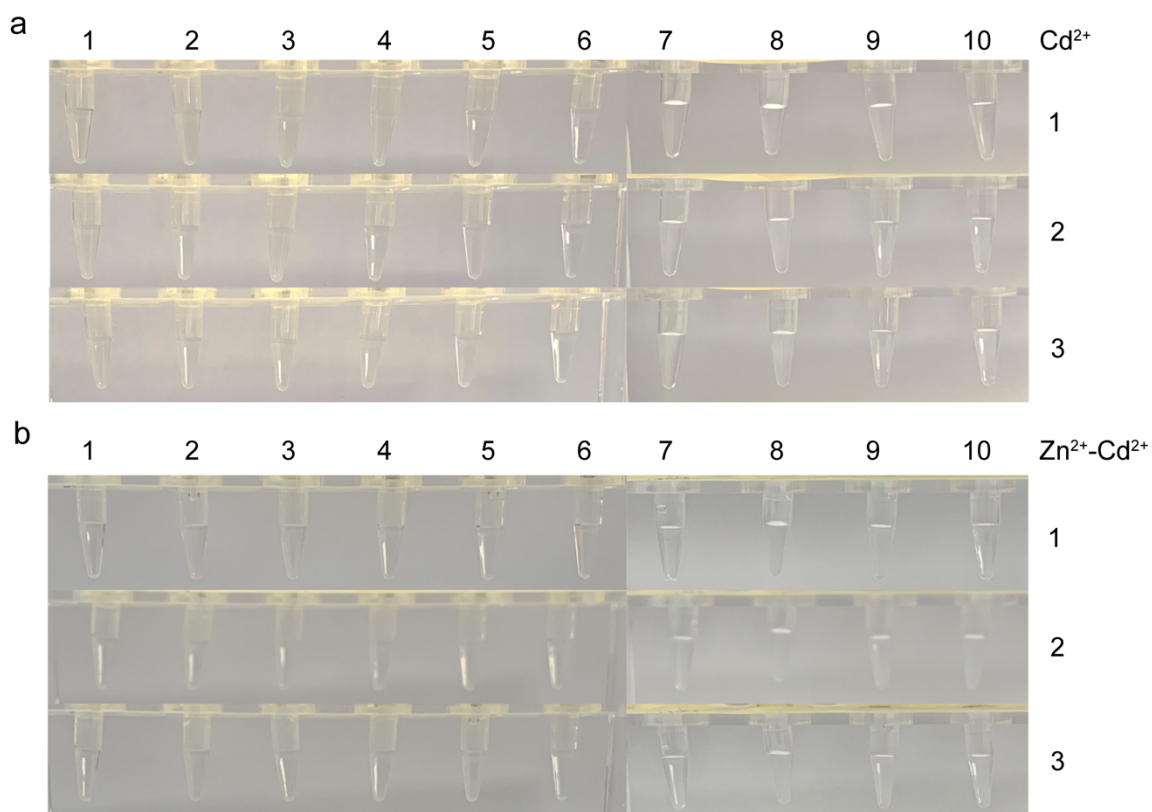

**Fig. S29** Images of different concentrations of (a)  $\text{Cd}^{2+}$  and (b)  $\text{Zn}^{2+}$ - $\text{Cd}^{2+}$  solutions.

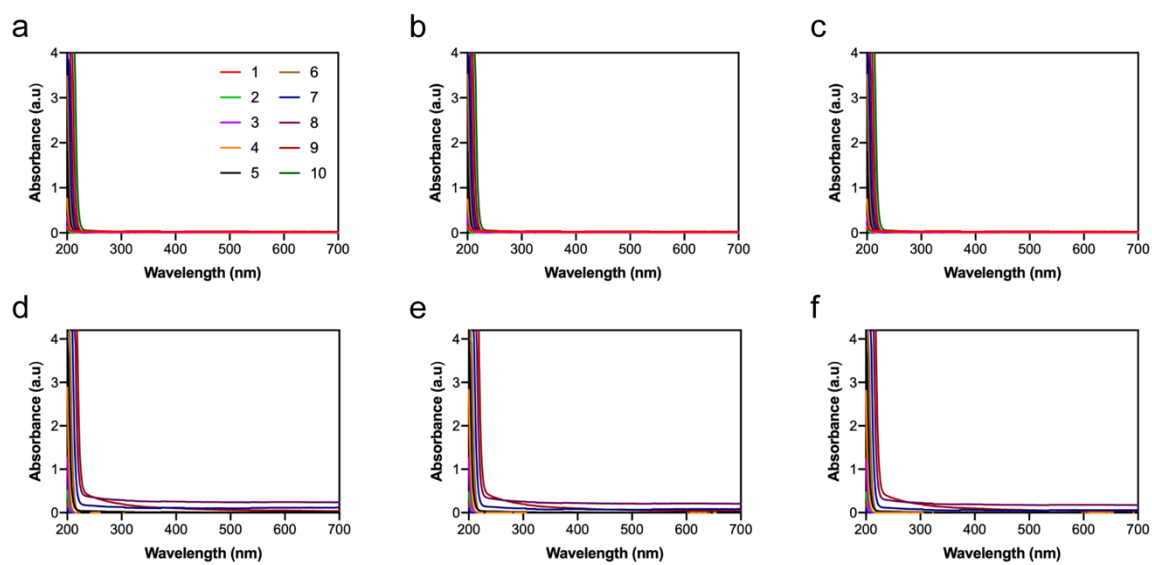

**Fig. S30** UV-Vis absorbance of different concentrations of (a-c)  $\text{Cd}^{2+}$  and (d-f)  $\text{Zn}^{2+}$ , (g-i)  $\text{Zn}^{2+}$ - $\text{Cd}^{2+}$ .

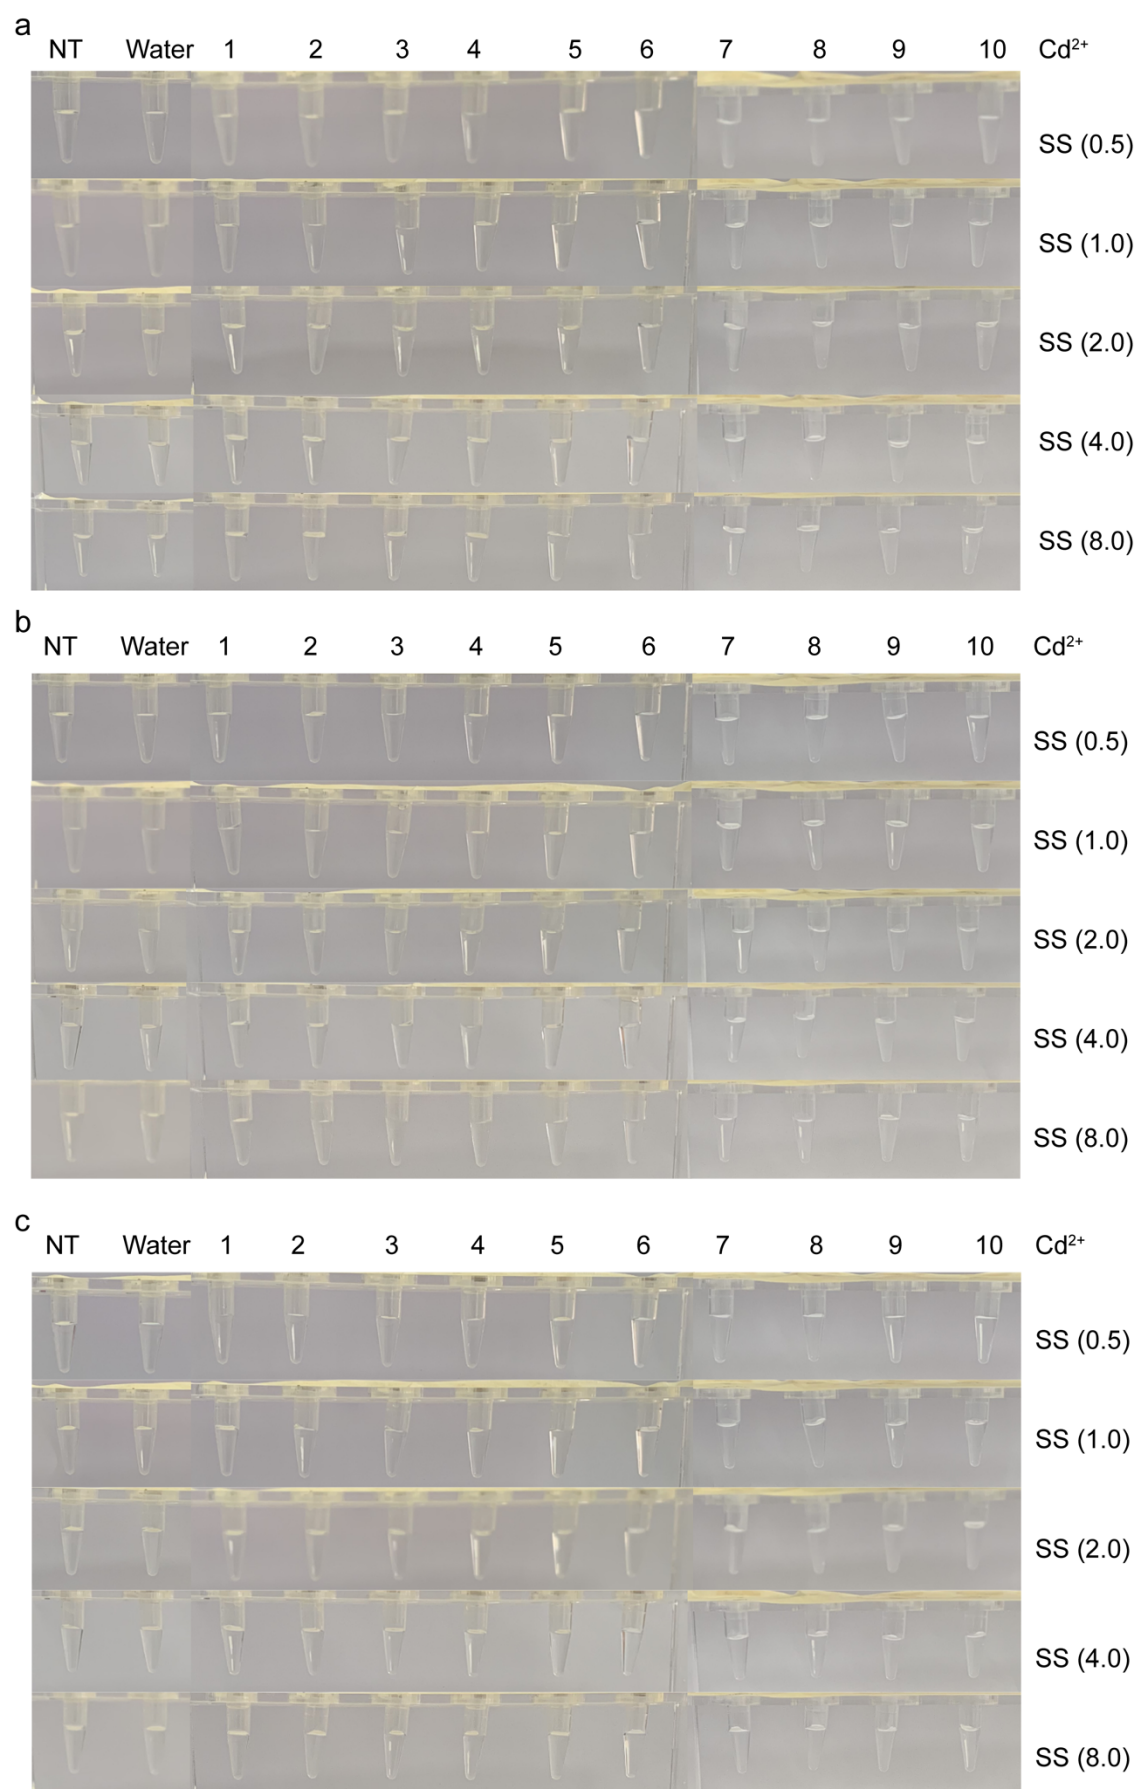

**Fig. S31** Images of different concentrations of SS mixed with  $\text{Cd}^{2+}$ .

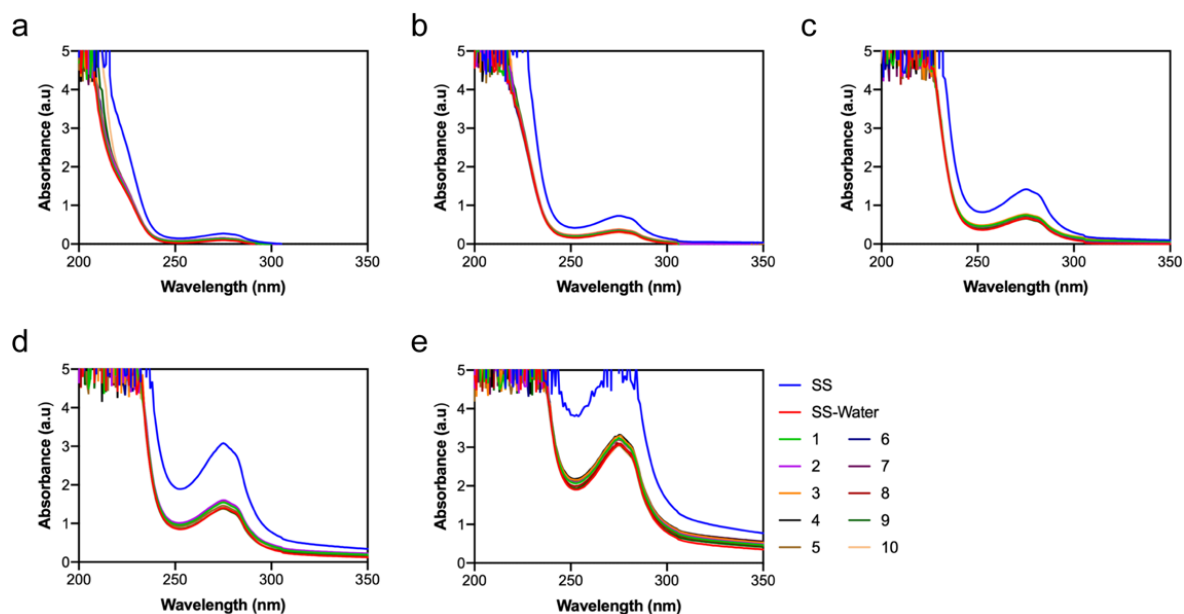

**Fig. S32** UV-Vis absorbance of (a) SS (0.5), (b) SS (1.0), (c) SS (2.0), (d) SS (4.0), and (e) SS (8.0) mixed with  $\text{Cd}^{2+}$  (Test 1).

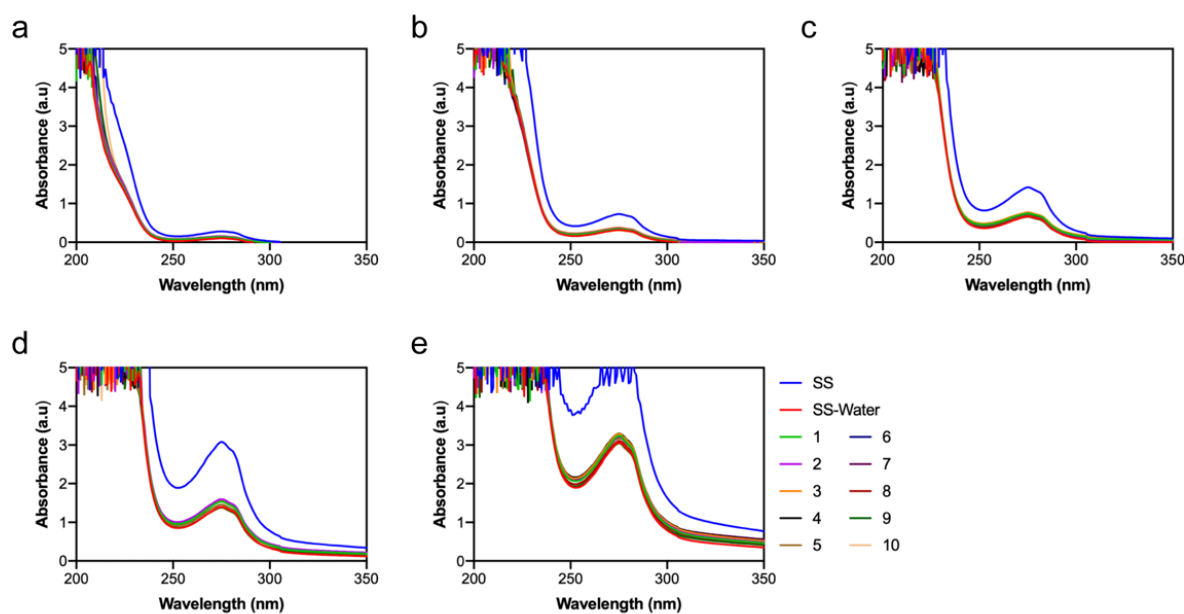

**Fig. S33** UV-Vis absorbance of (a) SS (0.5), (b) SS (1.0), (c) SS (2.0), (d) SS (4.0), and (e) SS (8.0) mixed with  $\text{Cd}^{2+}$  (Test 2).

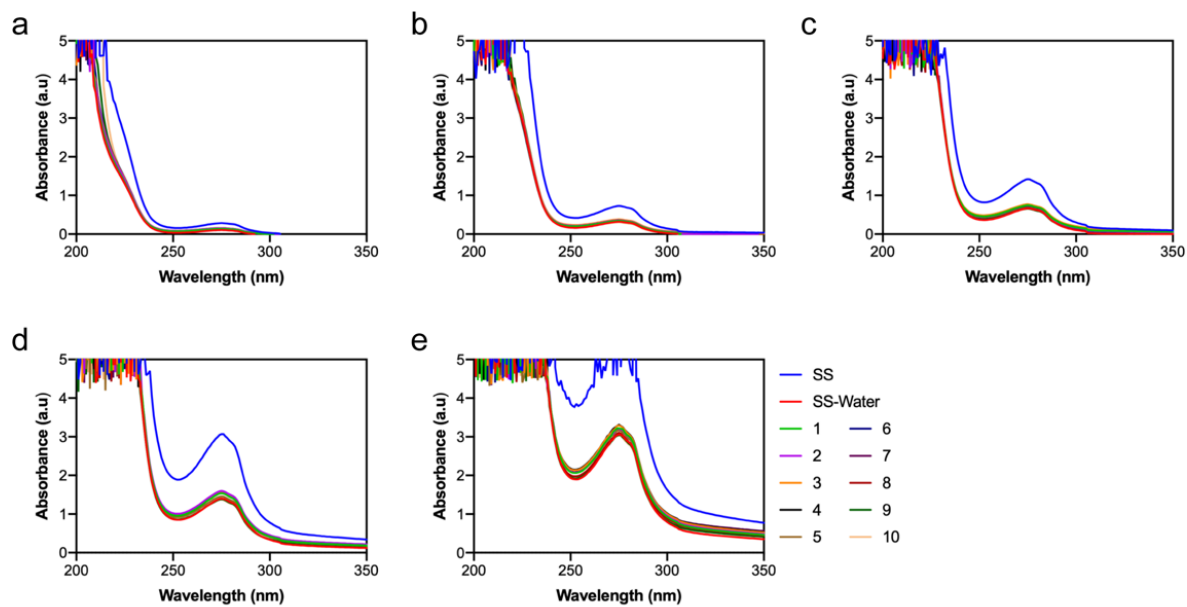

**Fig. S34** UV-Vis absorbance of (a) SS (0.5), (b) SS (1.0), (c) SS (2.0), (d) SS (4.0), and (e) SS (8.0) mixed with  $\text{Cd}^{2+}$  (Test 3).



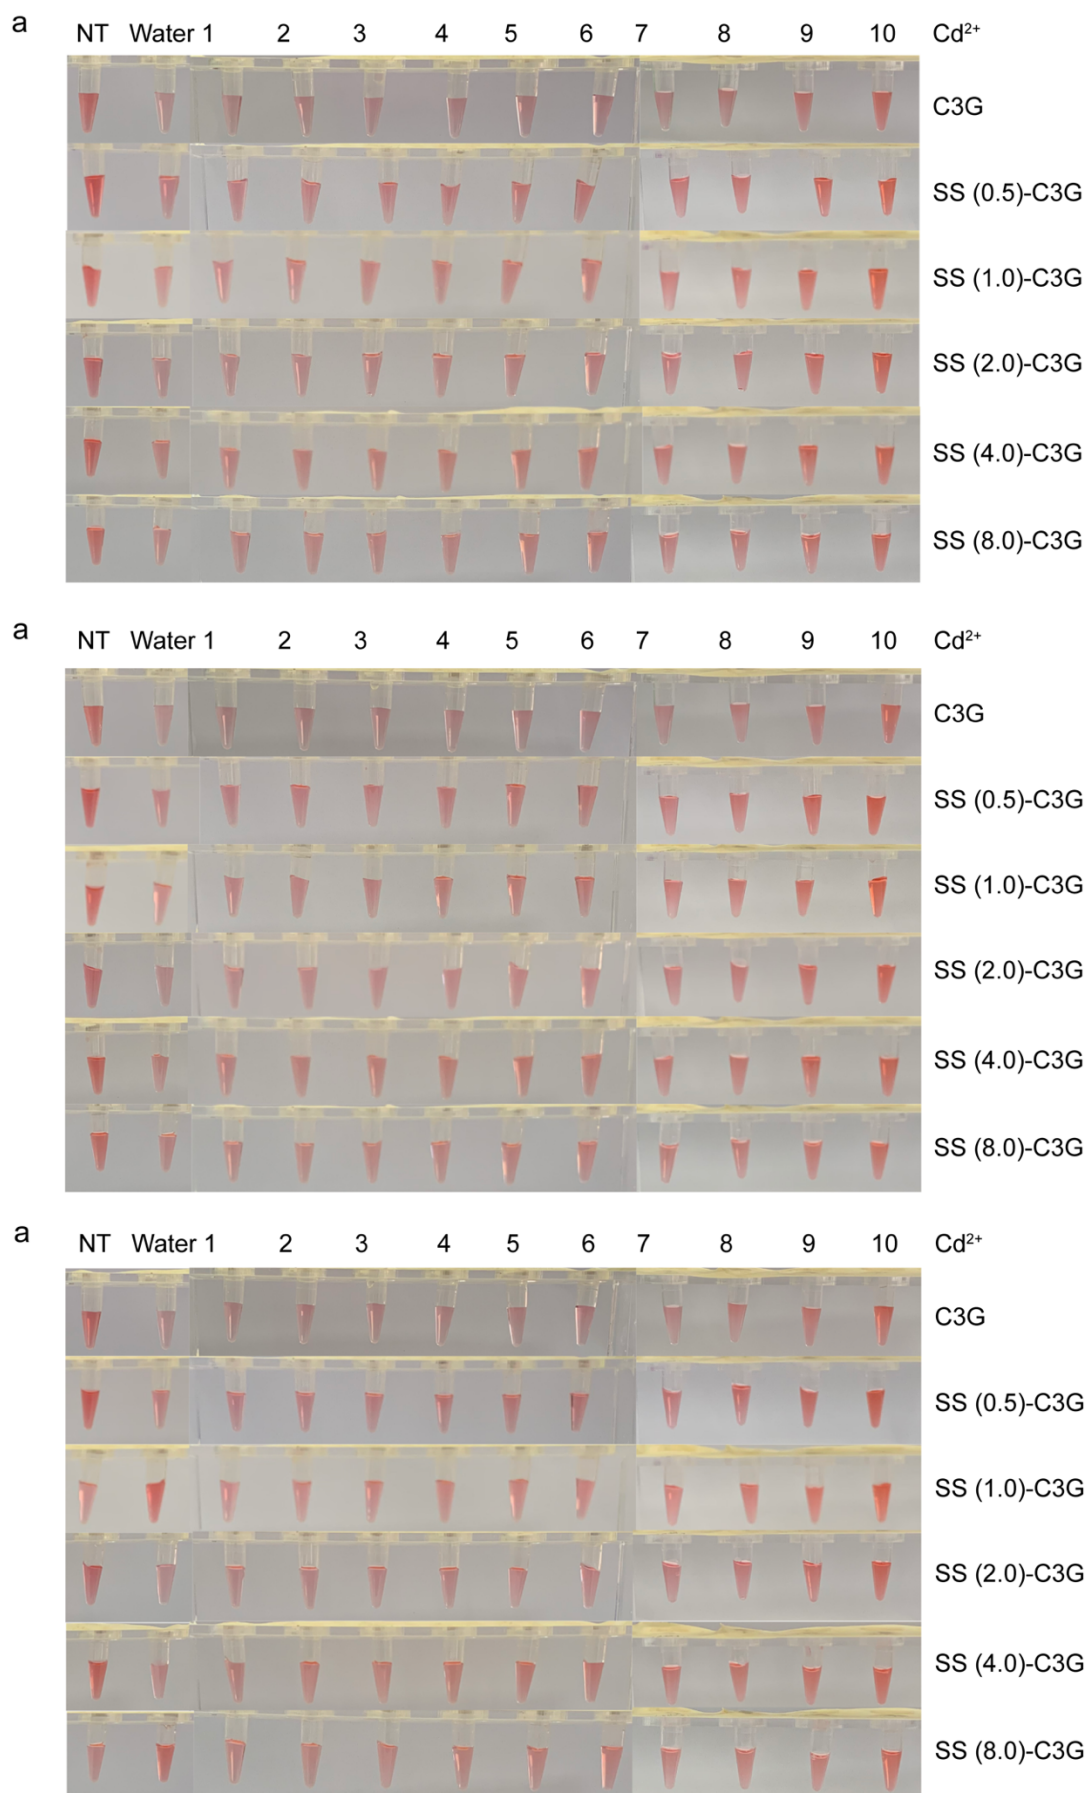

**Fig. S35** Images of C3G and SS-C3G nanocomplex after mixing with different concentrations of  $\text{Cd}^{2+}$ .

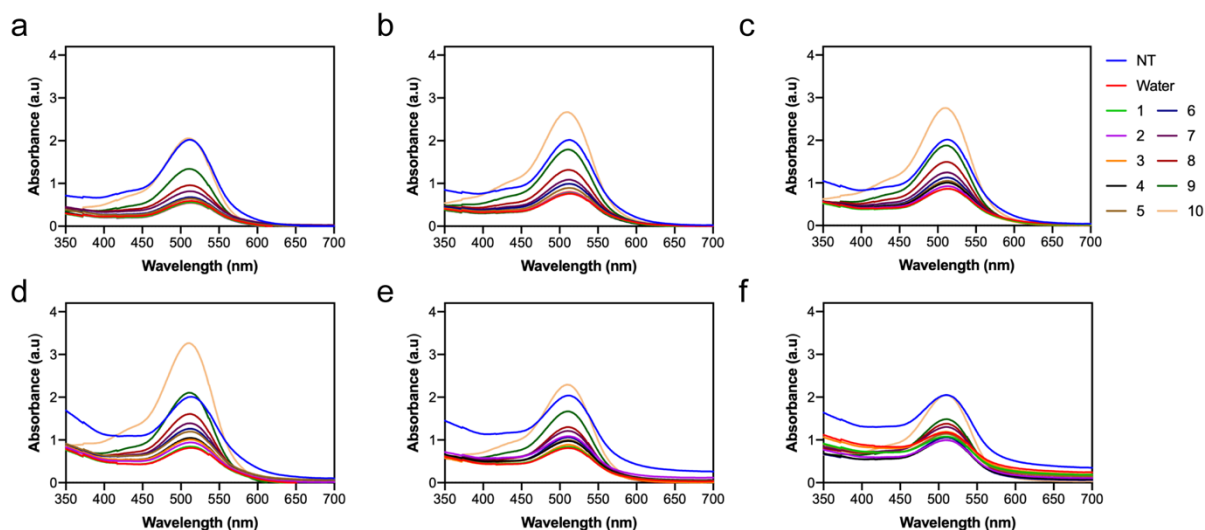

**Fig. S36** UV-Vis absorbance (a) C3G, (b) SS (0.5)-C3G, (c) SS (1.0)-C3G, (d) SS (2.0)-C3G, (e) SS (4.0)-C3G, and (f) SS (8.0)-C3G mixed with different concentrations of  $\text{Cd}^{2+}$  (Test 1).

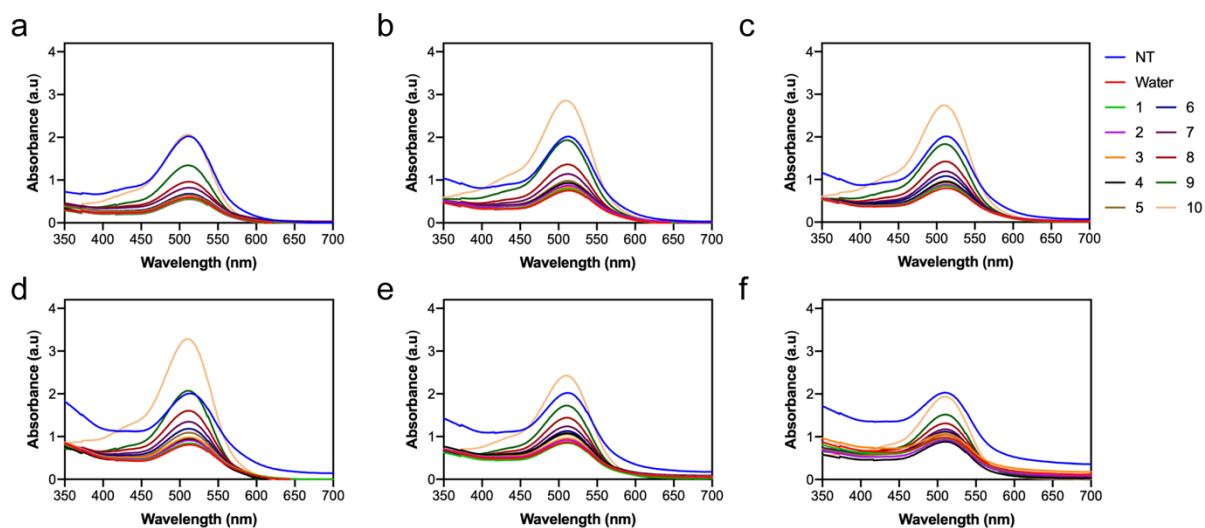

**Fig. S37** UV-Vis absorbance (a) C3G, (b) SS (0.5)-C3G, (c) SS (1.0)-C3G, (d) SS (2.0)-C3G, (e) SS (4.0)-C3G, and (f) SS (8.0)-C3G mixed with different concentrations of  $\text{Cd}^{2+}$  (Test 2).

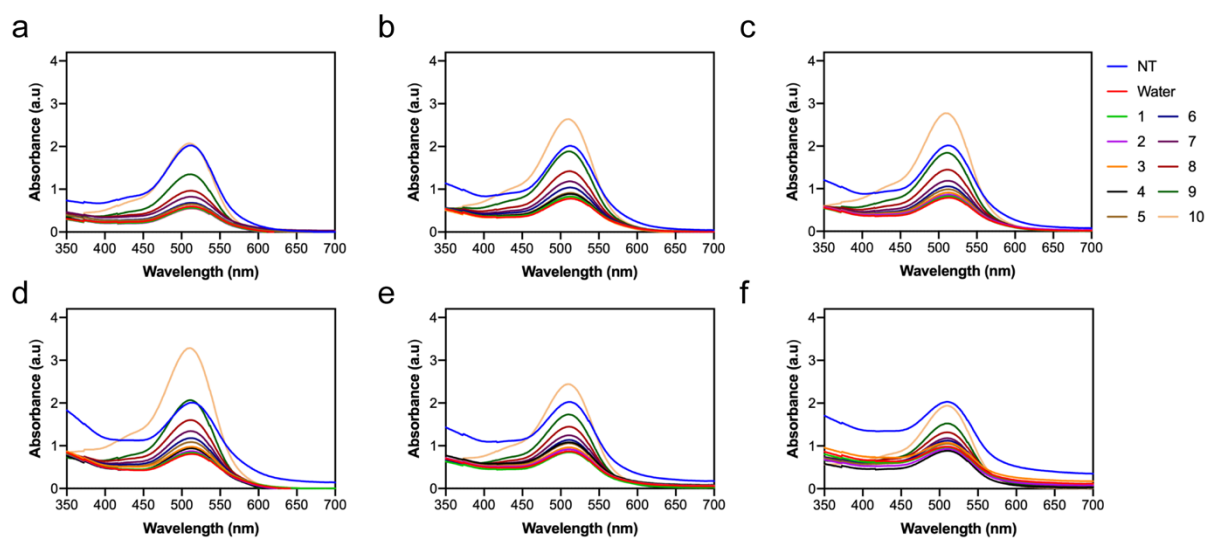

**Fig. S38** UV-Vis absorbance (a) C3G, (b) SS (0.5)-C3G, (c) SS (1.0)-C3G, (d) SS (2.0)-C3G, (e) SS (4.0)-C3G, and (f) SS (8.0)-C3G mixed with different concentrations of  $\text{Cd}^{2+}$  (Test 3).

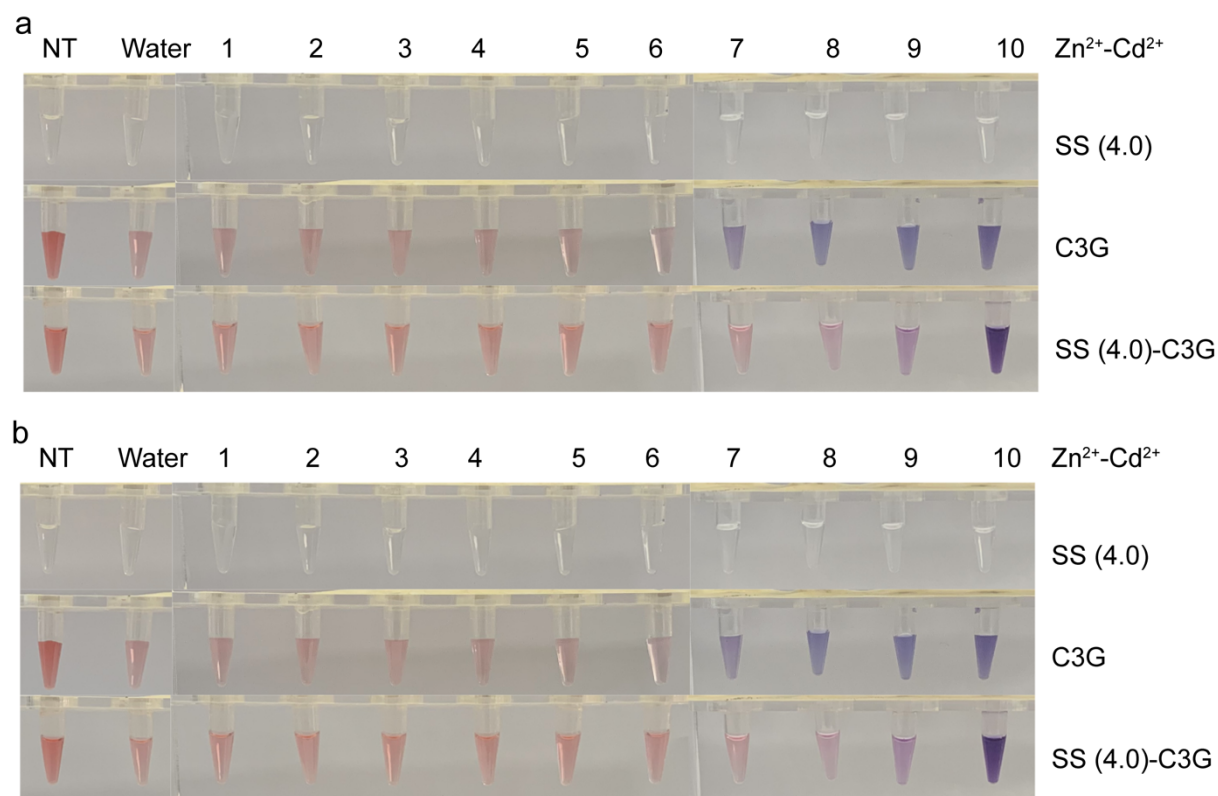

**Fig. S39** Images of C3G and SS-C3G nanocomplex after mixing with different concentrations of  $\text{Zn}^{2+}$ - $\text{Cd}^{2+}$ .

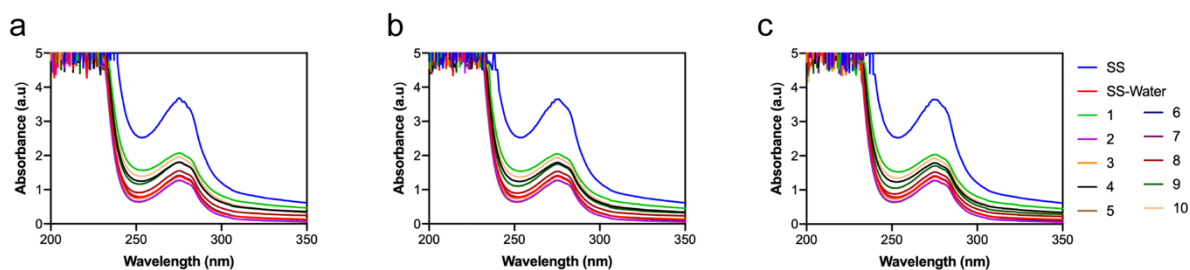

**Fig. S40** UV-Vis absorbance SS (4.0) mixed with different concentrations of  $\text{Zn}^{2+}$ - $\text{Cd}^{2+}$ .

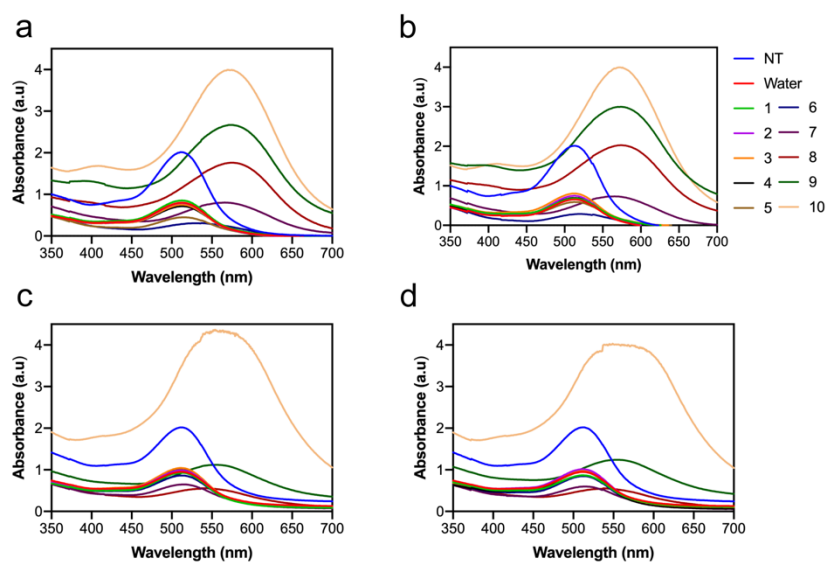

**Fig. S41** UV-Vis absorbance (a-b) C3G and (c-d) SS (4.0)-C3G mixed with different concentrations of  $\text{Zn}^{2+}$ - $\text{Cd}^{2+}$ .

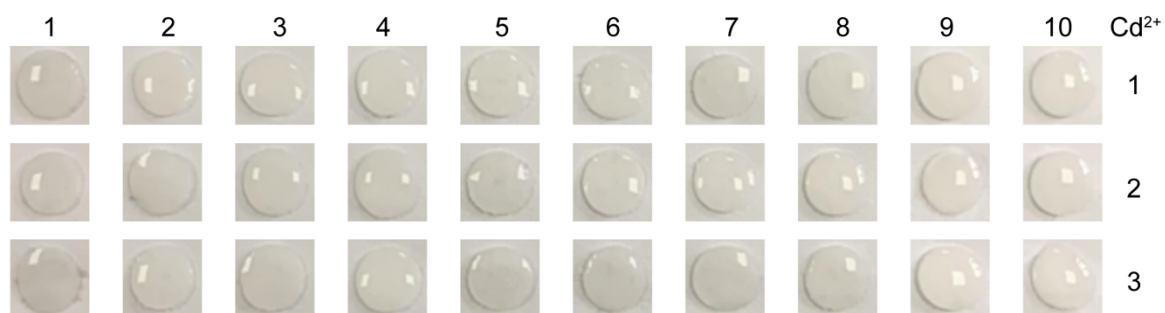

**Fig. S42** Images of filter paper after mixing with different concentrations of  $\text{Cd}^{2+}$ .



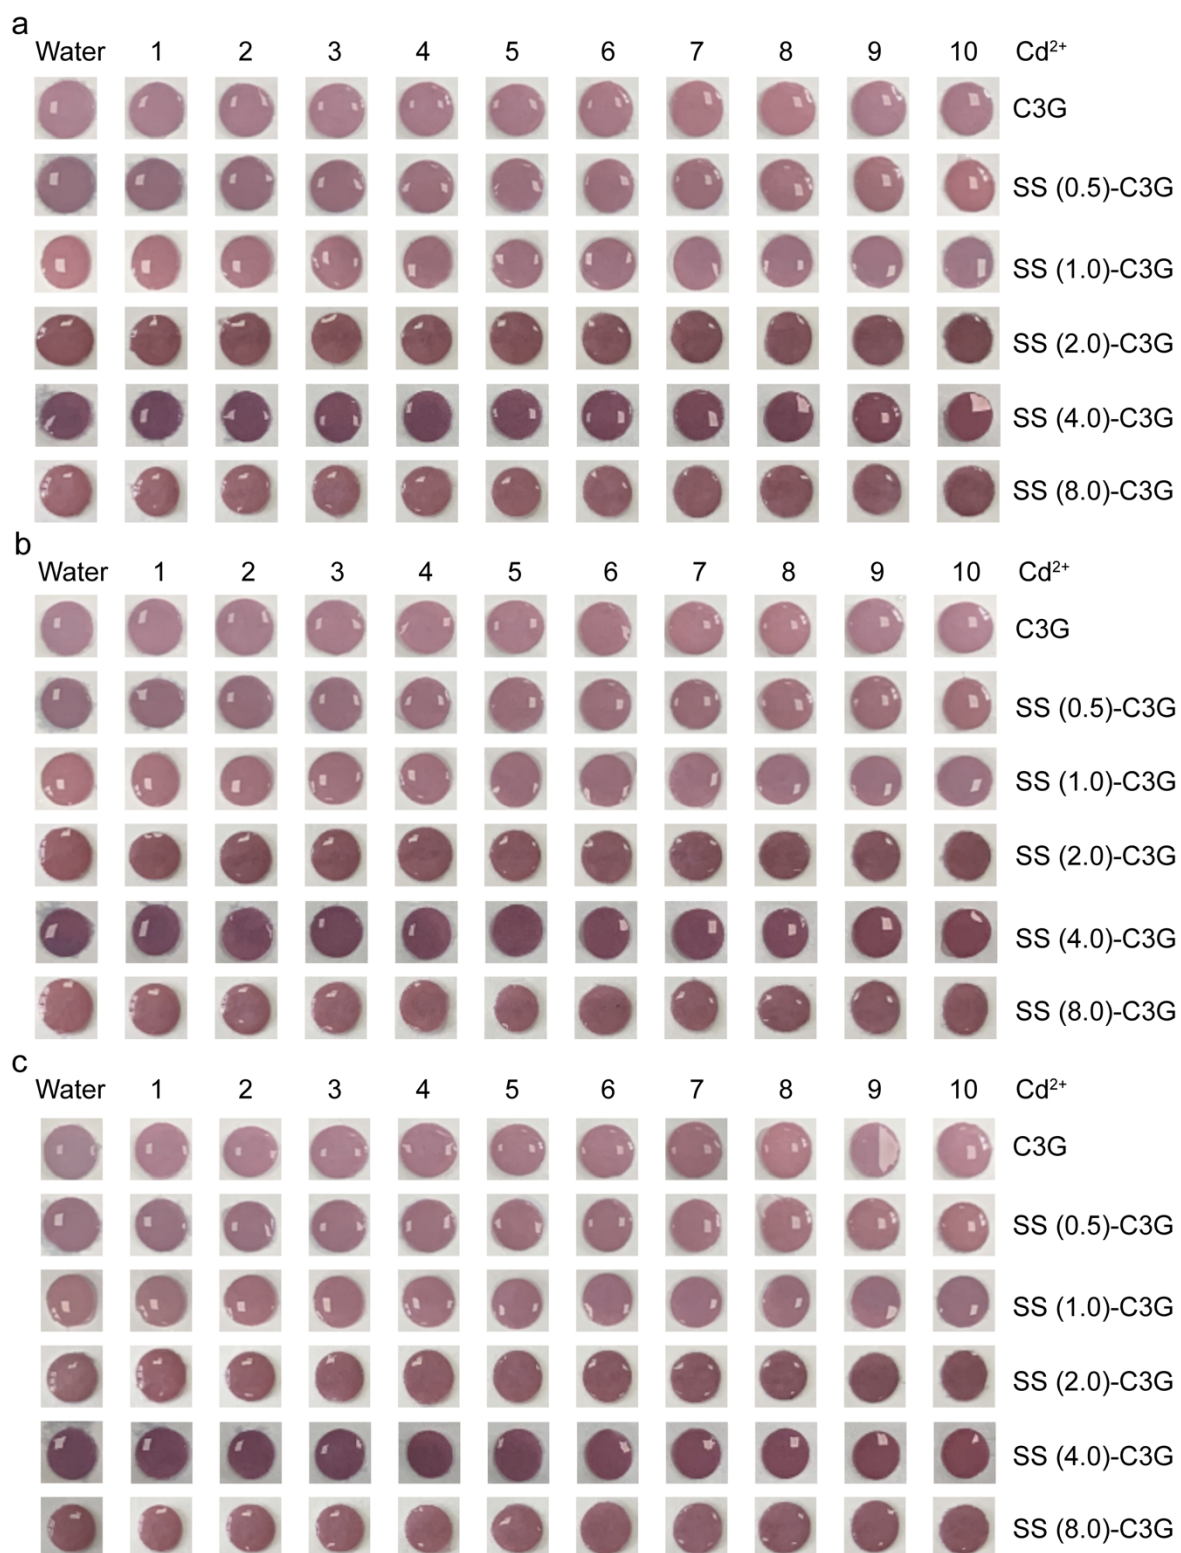

**Fig. S43** Images of C3G and SS-C3G nanocomplex films (filter paper) after mixing with different concentrations of  $\text{Cd}^{2+}$ .



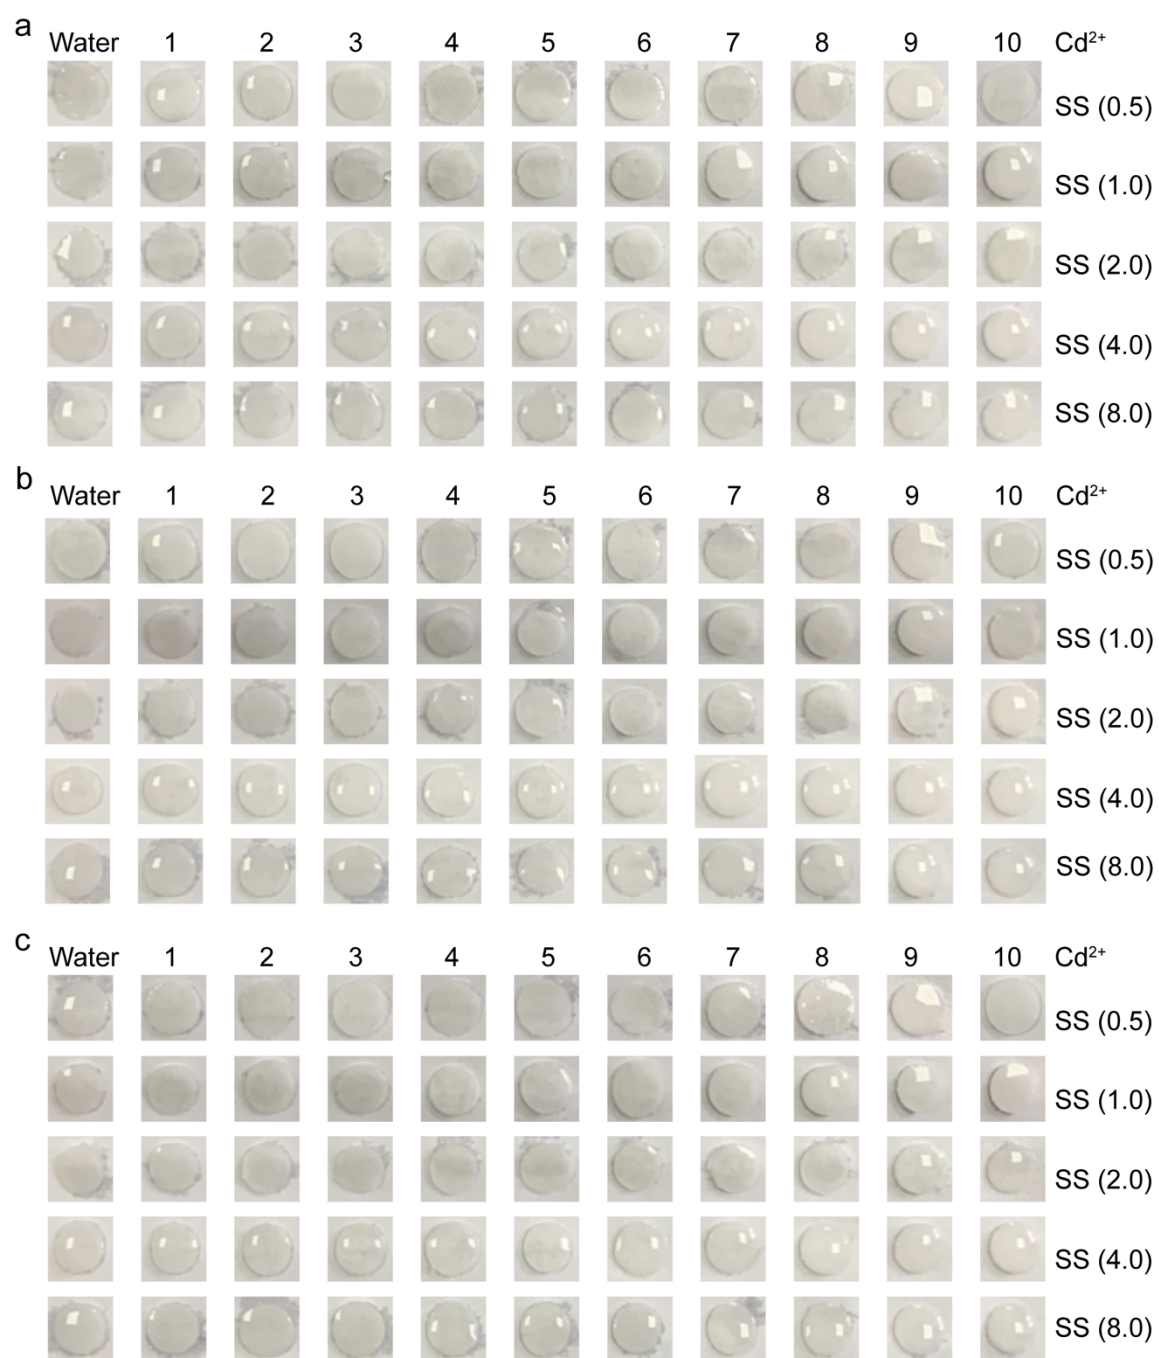

**Fig. S44** Images of SS films (filter paper) after mixing with different concentrations of  $\text{Cd}^{2+}$ .

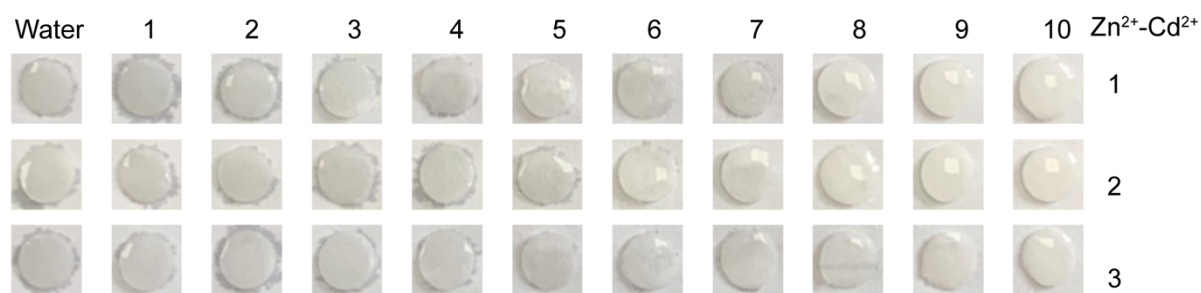

**Fig. S45** Images of filter paper after mixing with different concentrations of Zn<sup>2+</sup>-Cd<sup>2+</sup>.

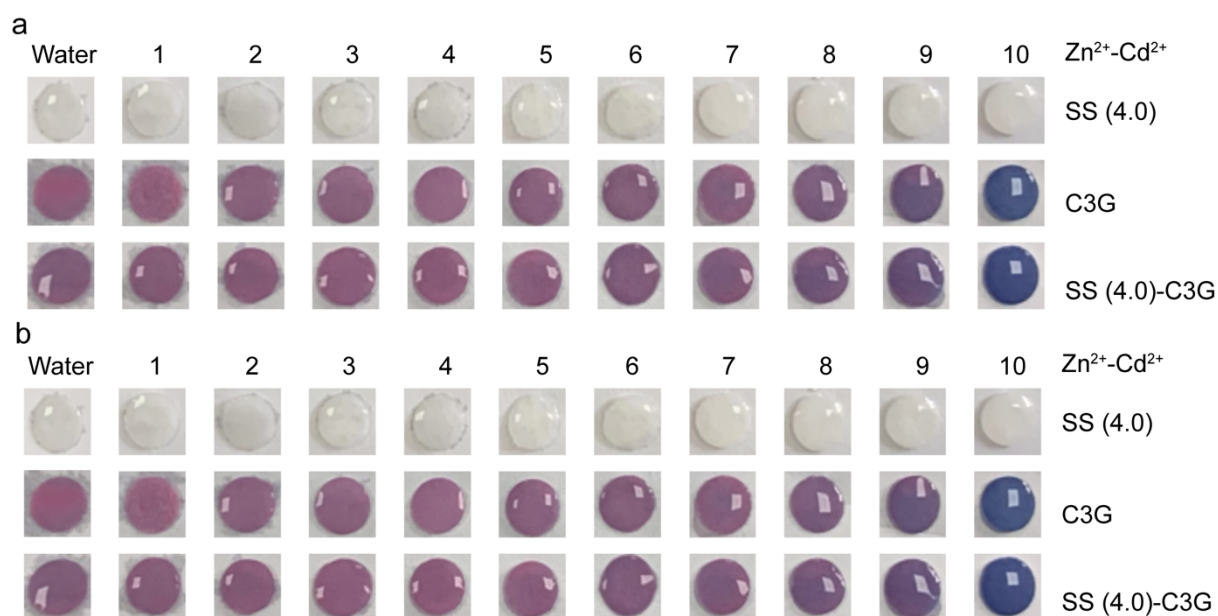

**Fig. S46** Images of SS, C3G, and SS-C3G nanocomplex (filter paper) after mixing with different concentrations of Zn<sup>2+</sup>-Cd<sup>2+</sup>.
